# Supplementary material for: Volatile Oxidation Products and Secondary Organosiloxane Aerosol from D 5 + OH at Varying OH Exposures
Source: Copernicus journal article supplement (doi:10.5194/egusphere-2023-1033), 2023-06-12
Supplement: Supplementary file 1 [file egusphere-2023-1033-supplement.pdf]

# 1 *Supplementary to Volatile Oxidation Products and Secondary* 2 **Organosiloxane Aerosol from D<sub>5</sub> + OH at Varying OH Exposures**

3 Hyun Gu Kang<sup>1</sup>, Yanfang Chen<sup>2</sup>, Jiwoo Jeong<sup>2</sup>, Yoojin Park<sup>3</sup>, Thomas Berkemeier<sup>1</sup>, Hwajin Kim<sup>2,4</sup>

4 <sup>1</sup>Multiphase Chemistry Department, Max Planck Institute for Chemistry, 55128 Mainz, Germany

5 <sup>2</sup>Department of Environmental Health Sciences, Graduate School of Public Health, Seoul National University, 08826 Seoul,  
6 South Korea

7 <sup>3</sup>Department of Environmental Science and Engineering, College of Engineering, Ewha Womans University, 03760 Seoul,  
8 South Korea

9 <sup>4</sup>Institute of Health and Environment, Graduate School of Public Health, Seoul National University, 08826 Seoul, South  
10 Korea

11 *Correspondence to:* Hwajin Kim (khj0116@snu.ac.kr) and Thomas Berkemeier (t.berkemeier@mpic.de)

## 12 **S1 Experiment and Set Up Details**

### 13 **S1.1 PAM-OFR**

14 Fig. S1 shows the experiment set up. During these experiments, the laboratory room temperatures and pressures were 17 – 21  
15 °C and ~1020 hPa (1 atm) respectively. In this manuscript, we used 1 atm for unit conversions and in KinSim. We passed  
16 different flow ratios of dry and humid zero air through the passivated 15 mL glass bulb to get the desired experiment humidity  
17 conditions. Mass flow controllers (MFC, MC and MCS series, Alicat Scientific, Tucson, AZ, USA) controlled the input air  
18 flow rates. Air coming out of the PAM-OFR and instrument outlets went to the exhaust or through scrubbers to minimize O<sub>3</sub>  
19 and aerosol exposure in the room. Ultra-high purity N<sub>2</sub> from a gas cylinder (Sinyang Oxygen Company, Seoul, South Korea)  
20 regulated to 30 psig purged the UV lamps.

21

22 The PAM-OFR was connected to an O<sub>3</sub> monitor (Model UV-100, 2B Technologies, Boulder, CO, USA) via the outlet side  
23 port. For the 120 s  $\tau_{\text{res}}$  experiment, a pump was attached to the outlet side port for additional flow. The PTR-MS inlet and the  
24 aerosol sampling line was connected at the OFR outlet center port (Fig. S1). We used perfluoroalkoxy alkane (PFA) tubing  
25 (6.35 mm (1/4") OD, 4.35 mm ID, Sungjin Rubber Industrial, Seoul, South Korea) for the connections to the OFR inlet. The  
26 OFR was equipped with conductive Teflon flow rings at both the inlet and the outlet side ports, and the D<sub>5</sub> and humid air were  
27 injected through the inlet side port.

28

29 We used D<sub>5</sub> (97 %, CAS#541-02-6, Sigma-Aldrich, Saint Louis, MO, USA) as the VOC precursor and stored the D<sub>5</sub> in a  
30 refrigerator (~-1 °C) when not in use. A syringe pump (Fusion 4000, Chemyx, Stafford, TX, USA) equipped with a 10 uL gas-  
31 tight microliter syringe (Model 1801, Hamilton, Reno, NV, USA) continuously injected D<sub>5</sub> into the PAM-OFR. The syringe

32 fed into the passivated glass bulb through a polytetrafluoroethylene-faced (PTFE) septa (13 mm, Scilab, Seoul, South Korea)  
33 at room temperature. At the injection speeds and air flow rates used, we did not visually observe any D<sub>5</sub> build-up in the bulb.  
34

35 For cleaning, making atomizer solutions, and generating humid air for the PAM-OFR, we used Type 1 deionized water (DI  
36 water, >18.2 MΩ cm resistivity at 25 °C) from a purification system (Milli-Q Direct 16, Merck, Darmstadt, Germany). We  
37 rinsed the microliter syringe between experiments with acetone and DI water and dried them at room temperature in the fume  
38 hood. The passivated glass bulb was also rinsed with acetone and DI water and heated in a drying oven before the experiments.  
39

40 Zero air came from a generator (Model 8301P, Acoem Ecotech, Victoria, Australia) coupled with a catalytic converter set to  
41 520 °C (Model HTO-1000HC, Acoem Ecotech, Victoria, Australia). The zero air also passed through scrubbers filled with  
42 activated molecular sieves (4 Å 4 – 8 mesh, Sigma-Aldrich, Saint Louis, MO, USA), NaMnO<sub>4</sub> oxidizing media (Purafil SP,  
43 Purafil, Doraville, GA, USA), and activated carbon (Purakol, Purafil, Doraville, GA, USA). Lastly, the zero air went through  
44 a filtered air supply (Model 3074B, TSI, Shoreview, MN, USA) prior to injection to the PAM-OFR and the Nafion humidifier  
45 (FC-100-80-6MKK, Perma Pure, Lakewood, NJ, USA).  
46

47 To assess the OH<sub>exp</sub> range, we conducted an offline calibration on the PAM-OFR with calibration CO gas (UnionGas,  
48 Gyeonggi-do, South Korea) with a Serinus 30i CO analyzer (Acoem Ecotech, Victoria, Australia). We used humidity  
49 conditions close to that of the experiments (Fig. S2). We used the D<sub>5</sub> siloxane trace as a direct measure of OH<sub>exp</sub> during the  
50 experiments themselves and found the OH<sub>exp</sub> assessed with D<sub>5</sub> to be consistent with the offline calibration with CO. We did  
51 not operate the CO analyzer during the experiments to avoid the risk of siloxanes fouling its catalytic converter (Dewil et al.,  
52 2006).

## 53 **S1.2 Aerosol Sampling Line**

54 The aerosol sampling line was connected at the PAM-OFR center outlet port and lead to the SMPS. The sampling line consisted  
55 of a O<sub>3</sub> denuder and a Nafion dryer (PD-200T-12MSS, Perma Pure, Lakewood, NJ, USA) with conductive connections and  
56 fittings in between. We installed the O<sub>3</sub> denuder in the sampling line to prevent O<sub>3</sub> damage to the SMPS, and it was a diffusion  
57 denuder filled with hopcalite pellets (3 mm, Purelyst MD-101, Pure Sphere, Chungcheongnam-do, South Korea). The custom-  
58 made diffusion denuder was cylindrical in shape at 52 cm long and 6.5 cm in diameter, and the wet particles would pass  
59 through a 12.7 mm (1/2") ID center line made of stainless mesh. Prior to experiments, we passed filtered compressed air  
60 through the O<sub>3</sub> denuder at 10 L min<sup>-1</sup> for ~30 min to remove any loose particles.  
61

62 We assessed the O<sub>3</sub> removal by comparing the concentrations entering and exiting the O<sub>3</sub> denuder filled with fresh hopcalite  
63 pellets. The flow rate through the O<sub>3</sub> denuder matched that of experiments (3.0 L min<sup>-1</sup>), and we used the same O<sub>3</sub> monitor  
64 used on the PAM-OFR. To generate O<sub>3</sub>, humid air was fed into the OFR with 185 nm lights on without siloxanes or seed, and

65 the OFR outputted 2.1 ppm of O<sub>3</sub>. We found that the denuder would remove ~90 % of the O<sub>3</sub> by concentration at these test  
66 conditions.

67

68 We used the particle loss calculator (von der Weiden et al., 2009) with the dimensions of the aerosol sampling line to calculate  
69 the size dependent losses in the line (Fig. S3). Given that we did not know at what point when the SOSiA was formed in the  
70 PAM-OFR, we only applied the particle loss in the aerosol sampling line to correct the Y<sub>SOSiA</sub>. The particle loss corrections to  
71 the Y<sub>SOSiA</sub> were done by applying the particle loss at the experiment SOSiA volume mode with that from the calculator.

72

73 To prevent siloxane contamination from conductive silicone tubing (Timko et al., 2009; Yu et al., 2009; Asbach et al., 2016),  
74 we used conductive PFA tubing (6.35 mm (1/4") OD, 4.76 mm (3/16") ID, Fluorotherm Polymers, Parsippany, NJ, USA) and  
75 stainless-steel compression fittings for the connections in the aerosol sampling line. In this experiment set up, we only used  
76 conductive silicone tubing (12 cm, 9.53 mm (0.375") OD, 4.8 mm (0.19") ID, TSI, Shoreview, MN, USA) at the inlet of the  
77 SMPS and for connections between the SMPS components.

### 78 **S1.3 Condensational Sink and Condensation Lifetime**

79 We followed the instructions in Section 3.3 of Palm et al. (2016) to calculate the condensational sink ( $CS$ , m<sup>2</sup>) and low-volatile  
80 organic compound (LVOC) condensation lifetimes ( $\tau_{CS}$ , s), where we used the particle number size distribution from the SMPS.  
81 In Eq. (S1),  $r$  is the wet particle radius (m),  $N$  is the particle number size distribution (m<sup>-3</sup> at each particle diameter), and  $\beta$  is  
82 the dimensionless Fuchs-Sutugin correction factor (Seinfeld and Pandis, 2006). In Eq. (S2), we used the same gas diffusion  
83 coefficient ( $D_g$ ) used by Palm et al. (2016) of  $7 \times 10^{-6}$  m<sup>2</sup> s<sup>-1</sup>, which represents LVOC. In Eq. (S3),  $\alpha$  is the dimensionless  
84 accommodation coefficient that is assumed to be 1 (Liu et al., 2019).

85

$$86 \quad CS = \int_0^{\infty} r\beta(r)N(r)dr = \sum_0^{\infty} r\beta(r)N(r) \quad (S1)$$

87

$$88 \quad \tau_{CS} = \frac{1}{4\pi \times CS \times D_g} \quad (S2)$$

89

$$90 \quad \beta(r) = \frac{Kn+1}{0.377Kn+1+\frac{4}{3}\alpha^{-1}Kn^2+\frac{4}{3}\alpha^{-1}Kn} \quad (S3)$$

91

92 To obtain  $\beta$ , we calculated the dimensionless Knudsen number ( $Kn$ ), the mean free path ( $\lambda_g$ , m), and the gas average speed  
93 ( $v_{avg}$ , m s<sup>-1</sup>) for LVOC at each  $r$ . In Eq. (S6),  $T$  refers to the temperature (K) in the PAM-OFR and  $R$  is the gas constant ( $R =$   
94  $8.3145$  kg m<sup>2</sup> s<sup>-2</sup> K<sup>-1</sup> mol<sup>-1</sup>). Since particles were dried before being detected by the SMPS, we obtained  $r$  in Eq. (S1) and (S4)

95 by multiplying the dry particle radius with the growth factor ( $GF$ ), which is the ratio of the wet particle diameter versus when  
96 the particle is dry (Fig. S5).

97

$$98 \quad Kn = \frac{\lambda_g}{r} \quad (S4)$$

99

$$100 \quad \lambda_g = \frac{3D_g}{v_{avg}} \quad (S5)$$

101

$$102 \quad v_{avg} = \sqrt{\frac{8RT}{\pi M}} \quad (S6)$$

103

104 We found  $GF$  with Eq. (S7), where  $\kappa$  is the dimensionless hygroscopicity parameter and  $\alpha_w$  is the dimensionless water activity  
105 approximated via  $\alpha_w = RH \% / 100$ . For  $\kappa$ , Palm et al. (2016) used a value representing that of SOA ( $\kappa = 0.13$ ), but Janecek et  
106 al. (2019) found SOSiA to be non-hygroscopic ( $\kappa = 0.01$ ). Consequently, we calculated the  $CS$  for both the LVOC and SOSiA  
107 cases, with molecular weights ( $M$ ) of LVOC,  $0.200 \text{ kg mol}^{-1}$ , and of  $D_5$ ,  $0.370 \text{ kg mol}^{-1}$ . The calculated  $GF$  for both cases are  
108 shown in Fig. S5 and Table S3.

109

$$110 \quad \kappa = (GF^3 - 1)(1 - \alpha_w)\alpha_w^{-1} \quad (S7)$$

111

112 The PAM-OFR has an estimated LVOC eddy diffusion wall loss lifetime ( $\tau_{wall}$ ) of 400 s (Palm et al., 2016), while the calculated  
113  $\tau_{CS}$  ranged up to  $\sim 2$  s when using the particle size distribution measured during experiments (Table S3). Palm et al. (2016)  
114 recommended using the average of the particle size distributions entering and exiting the OFR, which would double the  
115 aforementioned  $\tau_{CS}$  since we did not use seed aerosol. Either case, we expected the loss of LVOC to the walls to had been  
116 small since  $\tau_{CS} \ll \tau_{wall}$ .

#### 117 **S1.4 PTR-MS Inlet and Settings**

118 The PTR-MS inlet was made of SilcoNert 2000-coated (SilcoTek, Bellefonte, PA, USA) stainless steel inlet tubing (1.59 mm  
119 (1/16") OD, 1.0 mm (0.040") ID) at 1.2 m in length. The PTR-MS was connected immediately at the center outlet of the OFR  
120 with SilcoNert 2000-coated fittings (Swagelok, Solon, OH, USA) and conductive PFA tubing (Fluorotherm Polymers,  
121 Parsippany, NJ, USA). We set the flow rate into the PTR-MS inlet to  $0.43 \text{ L min}^{-1}$  using its built-in inlet flow controller and  
122 inlet pressure controller. The PTR-MS inlet was equipped with a heating hose set to  $60 \text{ }^\circ\text{C}$  and a dust filter to prevent clogging,  
123 especially at the high SOSiA masses. The single stage filter holder was made of PFA (Saville, Eden Prairie, MN, USA) and  
124 held a 25 mm PTFE filter ( $5 \text{ } \mu\text{m}$  pore, Synspec, Groningen, Netherlands) that was replaced daily.

125

126 The mass spectrometer extraction time and maximum flight times were 2.0 and 20.0  $\mu\text{s}$  respectively, with the maximum mass  
127 at  $m/z$  632.0. The mass spectra were integrated and recorded every 1000 ms. For the PTR-MS mass scale calibration, we used  
128  $(\text{H}_2^{18}\text{O})\text{H}^+$  ( $m/z$  21.0221),  $(\text{H}_2\text{O})_2\text{H}^+$  ( $m/z$  37.0284),  $(\text{C}_6\text{H}_4\text{I})\text{H}^+$  ( $m/z$  203.9431), and  $(\text{C}_6\text{H}_4\text{I}_2)\text{H}^+$  ( $m/z$  330.8475) during the data  
129 analysis. We used IoniTOF 4.0 to control the instrument and PTR-MS Viewer 3.4.4 (Ionicon Analytik, Innsbruck, Austria) to  
130 process the PTR-MS mass spectra.

### 131 **S1.5 PTR-MS Mass Spectra Interpretation**

132  $\text{D}_5$  has isotopologues (Fig. 1) whose ion masses overlap with those of VOP. Additionally, large alcohols fragment during the  
133 PTR (Brown et al., 2010), and the reported siloxanol ( $\text{D}_4\text{T-OH}$ ) or siloxanediol ( $\text{D}_3\text{T}_2\text{-(OH)}_2$ ) may have fragmented if they  
134 behave like saturated organic alcohols. Since we did not have siloxanol calibration standards, we opted to use the -OH  
135 fragmentation behavior of organic alcohols to assess the qualitative trends of the proposed VOP.

136  
137 We used the -OH fragment of  $\text{D}_4\text{T-OH}$  at  $m/z$  355, the -OH fragment of  $\text{D}_3\text{T}_2\text{-(OH)}_2$  at  $m/z$  357, and the -OH fragment of  $\text{D}_3\text{T}_2\text{-}$   
138  $\text{OH-OCHO}$  at  $m/z$  385 to assess the relative trends of these VOP (Table S4). However, the signal at  $m/z$  355 overlaps with the  
139 - $\text{CH}_3$  fragment of  $\text{D}_5$  ( $\text{C}_9\text{H}_{27}\text{O}_5\text{Si}_5^+$ ), as noted by Coggon et al. (2018). As for  $m/z$  357, this signal overlaps with an isotopologue  
140 of the - $\text{CH}_3$  fragment of  $\text{D}_5$  and the -OH fragment of  $\text{D}_4\text{T-OH}$ . To retrieve the signal of  $\text{D}_4\text{T-OH}$  and  $\text{D}_3\text{T}_2\text{-(OH)}_2$ , we subtracted  
141 the fragment and/or isotopologue signals from the total signal at the designated ion masses. For  $m/z$  355, we subtracted the -  
142  $\text{CH}_3$  fragment of  $\text{D}_5$  using the 355/371 ratio of  $\text{D}_5$  found prior to the experiment. For  $m/z$  357, we subtracted the  $\text{C}_9\text{H}_{27}\text{O}_5\text{Si}_5^+$   
143 isotopologue signal fraction.

144  
145 For the quantification of  $\text{D}_5$ , we opted to use the main  $\text{D}_5$  ion ( $\text{C}_{10}\text{H}_{30}\text{Si}_5$ ) $\text{H}^+$  at  $m/z$  371, as opposed to the - $\text{CH}_3$  fragment ion  
146 at  $m/z$  355. Coggon et al. (2018) used the  $\text{D}_5$  fragment ion for their ambient air measurements due to higher ion counts there.  
147  $\text{C}_9\text{H}_{27}\text{O}_5\text{Si}_5^+$  had a higher ion count than ( $\text{C}_{10}\text{H}_{30}\text{Si}_5$ ) $\text{H}^+$  during our calibrations and experiments as well, but the  $\text{D}_5$   
148 concentrations in these experiments were sufficiently high for quantification at  $m/z$  371. Additionally, Since the -OH fragment  
149 ion of  $\text{D}_4\text{T-OH}$  has the same elemental composition of the - $\text{CH}_3$  fragment of  $\text{D}_5$ , we chose the  $m/z$  371  $\text{D}_5$  ion to avoid potential  
150 overlaps in the  $\text{D}_5$  quantification.

151  
152 The PTR-MS is limited in the species it can detect and resolve. The PTR-MS configuration restricts the volatility range of  
153 identifiable species, where species are not fragmented during the PTR or lost on the surfaces of the instrument and inlet.  
154 Moreover, the PTR is known to fragment peroxides (Li et al., 2022), which limits their detection. Saturated alcohols larger  
155 than ethanol and unsaturated alcohols are also known to undergo fragmentation during ionization in the PTR-MS (Brown et  
156 al., 2010; Demarcke et al., 2010). Consequently, we cannot rule out that some  $\text{D}_5$  VOP fragments are being misattributed in  
157 the trends that we report.

158

159 For example, methanediol ( $\text{CH}_2(\text{OH})_2$ ) is the hydrated form of HCHO and has been observed to largely fragment to a  $-\text{H}_2\text{O}$   
160 PTR ion that overlaps at  $m/z$  31 (Franco et al., 2021). Although  $\text{CH}_2(\text{OH})_2$  may be formed in the gas phase through  $\text{HCHO} +$   
161  $\text{H}_2\text{O}$  via HCOOH catalysis (Hazra et al., 2013), the gaseous compound is thought to have evaporated after forming  
162 heterogeneously (Franco et al., 2021). Franco et al. (2021) also fitted the gaseous unimolecular dehydration ( $\text{CH}_2(\text{OH})_2 \rightarrow$   
163  $\text{HCHO} + \text{H}_2\text{O}$ ) rate coefficient  $k_{\text{CH}_2(\text{OH})_2}$  to be  $8.5 \times 10^{-5} \text{ s}^{-1}$ , which gives the species a unimolecular dehydration lifetime of  
164 0.14 days, which is longer than the residence time of the PAM-OFR. The dominant products from  $\text{CH}_2(\text{OH})_2 + \text{OH}$  are HCOOH  
165 and  $\text{HO}_2$  via the decomposition of the  $\text{RO}_2$ , and so this diol is practically an intermediate between HCHO and HCOOH.

166

167 Given the humid PAM-OFR conditions,  $\text{CH}_2(\text{OH})_2$  may have been present, and the  $-\text{OH}$  fragment ion may have led to the  
168 over-quantification of HCHO; the fragmentation of  $\text{CH}_2(\text{OH})_2$  during the PTR needs to be characterized to constrain this  
169 uncertainty. However, Franco et al. (2021) found that  $\text{CH}_2(\text{OH})_2 + \text{OH}$  has a rate coefficient of  $k_{\text{CH}_2(\text{OH})_2+\text{OH}} = \sim 7.5 \times 10^{-12} \text{ cm}^3$   
170  $\text{ s}^{-1}$ , and so we expected  $\text{CH}_2(\text{OH})_2$  to have a OH-oxidation lifetime less than that of  $\tau_{\text{res}}$  at the  $[\text{OH}]$  in the PAM-OFR.  
171 Consequently, we did not expect the  $\text{CH}_2(\text{OH})_2$  -OH fragment interference to the HCHO quantification to be large.

## 172 **S2 SOSiA Mass Density ( $\rho_{\text{SOSiA}}$ )**

173 In a separate series of experiments, we collected SOSiA filter samples from the PAM-OFR on pre-weighed PTFE filters (47  
174 mm, 2  $\mu\text{m}$  pore, PT48P-KR, MTL, Minneapolis, MN, USA), where we also operated the SMPS. Then, we stored the filter  
175 samples in a desiccator placed inside of a temperature and humidity-controlled micro-balance room for a day. We used a semi-  
176 micro balance ( $\pm 0.1 \text{ mg}$ , ME204, Mettler Toledo, Columbus, OH, USA) to weigh the filters and calculated the mean  $\rho_{\text{SOSiA}}$   
177 by dividing the masses of SOSiA collected over integrated SMPS volumes.

178

179 From five filter samples, we found a mean ( $\pm$  standard error)  $\rho_{\text{SOSiA}}$  of  $1.07 \pm 0.04 \text{ g cm}^{-3}$ . We note that existing publications  
180 used discrepant  $\rho_{\text{SOSiA}}$  values, which are summarized in Table S9. That range includes those representing SOA (Charan et al.,  
181 2022) or  $\text{D}_5$  itself (Janecek et al., 2019). Wu and Johnston (2017) did not explicitly state the  $\rho_{\text{SOSiA}}$  they used. Han et al. (2022)  
182 used particle size and mass data from an SMPS and an AMS to get  $\rho_{\text{SOSiA}}$  of 1.6 – 1.8  $\text{g cm}^{-3}$  for SOSiA from different siloxane  
183 precursors. Avery et al. (2023) used the SOSiA elemental ratios from the AMS with the method described by Kuwata et al.  
184 (2012) to obtain  $\rho_{\text{SOSiA}}$  of 1.59 – 1.78  $\text{g cm}^{-3}$ .

185

186 For reference, Fytas and Wang (1984) measured the density of several methylphenylsiloxane oligomers, which ranged from  
187 0.99 – 1.10  $\text{g cm}^{-3}$ , while He et al. (1988) used a polydimethylsiloxane density parameterization based on molecular weight  
188 that maximizes to 0.97  $\text{g cm}^{-3}$ . Dee et al. (1992) measured the densities of polydimethylsiloxane oligomers and found values  
189 between 1 to 1.14  $\text{g cm}^{-3}$ . One of the silanols formed in the siloxane degradation process is dimethylsilanediol (DMSD,

190 C<sub>2</sub>H<sub>8</sub>O<sub>2</sub>Si), and Mazzone et al. (1997) calculated DMSD to have a density of 1.023 g cm<sup>-3</sup> at 20 °C using a group contribution  
191 method. Lamers et al. (2021) found that dimethylsiloxane oligomers of varying lengths would have densities of ~1 g cm<sup>-3</sup>.

192

193 While the  $\rho_{\text{SOSiA}}$  we measured are in line with literature siloxane/silanol densities, they are lower than those reported by Han  
194 et al. (2022) and Avery et al. (2023). Some of the difference between their and our  $\rho_{\text{SOSiA}}$  measurements may be explained by  
195 the different experiment conditions, such as OH<sub>exp</sub>, since aerosol density is expected to increase with higher oxygenation  
196 (Kuwata et al., 2012; Nakao et al., 2013). Moreover, Han et al. (2022), Avery et al. (2023), and this study each used different  
197 methods to measure  $\rho_{\text{SOSiA}}$ .

### 198 S3 PTR-MS Calibration

199 For HCHO, we used a paraformaldehyde permeation tube (CAS#30525-89-4, VICI Metronics, Poughkeepsie, NY, USA) and a  
200 calibration gas generator (Model 150 Dynacalibrator, VICI Metronics, Poughkeepsie, NY, USA) set to 70 °C to produce HCHO  
201 calibration gas with ultra-high purity N<sub>2</sub> as the carrier gas. To achieve a steady output, we conditioned the permeation tube in  
202 the calibration gas generator for a week at the temperature and carrier gas flow rate to be used during the calibration. The  
203 HCHO calibration gas was diluted dynamically to achieve target concentrations with zero/humid air and MFCs, and we  
204 corrected the HCHO quantification for humidity using Eq. (S8) from Vlasenko et al. (2010), where  $k_{\text{rev}}$  is the fitted reverse  
205 PTR rate coefficient (cm<sup>3</sup> s<sup>-1</sup>), [H<sub>2</sub>O]<sub>dry</sub> is the H<sub>2</sub>O concentration (cm<sup>-3</sup>) in the drift tube when sample air is dry, [H<sub>2</sub>O] is the  
206 water concentration (cm<sup>-3</sup>) in the drift tube when sample air is humid, and  $\Delta t$  is the drift tube reaction time ( $9.4 \times 10^{-5}$  s).

207

$$208 \frac{\text{Sensitivity}_{\text{meas}}}{\text{Sensitivity}_{\text{dry}}} = \frac{[\text{H}_2\text{O}]_{\text{dry}}(1 - e^{-k_{\text{rev}}[\text{H}_2\text{O}]\Delta t})}{[\text{H}_2\text{O}](1 - e^{-k_{\text{rev}}[\text{H}_2\text{O}]_{\text{dry}}\Delta t})} \quad (\text{S8})$$

209

210 To obtain [H<sub>2</sub>O]<sub>dry</sub>, we followed the method described in Vlasenko et al. (2010), where we fitted a quadratic polynomial (Eq.  
211 (S9)) to (H<sub>2</sub>O)<sub>2H+</sub> (ncps) against the sample air absolute humidity (Fig. S6.B3). Then, we took the fitted y-intercept ( $\approx 4000$ )  
212 and linearly approximated the corresponding absolute humidity at 2×y-intercept, which comes to be  $\sim 0.005$  mol/mol. Lastly,  
213 we converted the [H<sub>2</sub>O]<sub>dry</sub> mixing ratio to cm<sup>-3</sup> using the drift tube pressure (2.30 mbar) and temperature (80 °C).

214

$$215 I_{(\text{H}_2\text{O})_{2\text{H}+}} = A + Bx + Cx^2 \quad (\text{S9})$$

216

217 For HCOOH, a 1 % (w/w) aqueous solution of HCOOH (>98.0 %, CAS#64-18-6, Tokyo Chemical Industry, Tokyo, Japan)  
218 was injected into the VOC bulb with a syringe pump and zero/humid air flowing through the bulb. Like Baasandorj et al.  
219 (2015), we found the PTR-MS sensitivity at  $m/z$  47 to be affected by humidity, with sensitivity decreasing with higher RH at

220 137 Td. Consequently, we adjusted the HCOOH quantification for H<sub>2</sub>O cluster effects with the method outlined in Baasandorj  
221 et al. (2015). We fitted the parameters in Eq. (S10), where  $x$  is  $I_{(\text{H}_2\text{O})_2\text{H}^+}/I_{(\text{H}_2\text{O})\text{H}^+}$ .

222

$$223 \text{ Sensitivity} = A \times (B_1 \exp(C_1 x) + B_2 \exp(C_2 x)) \quad (\text{S10})$$

224

## 225 **S4 Odum 2-product Model**

226 Eq. (S11) shows the Odum 2-product parameterization (Odum et al., 1996) for aerosol mass yields, in this case for SOSiA.  
227 Janecek et al. (2019) and Charan et al. (2022) fitted their data, and we also parameterize the experimental  $Y_{\text{SOSiA}}$  with the 2-  
228 product model in Eq. (S11) for comparison. The partitioning coefficient ( $K$ ,  $\text{m}^3 \mu\text{g}^{-1}$ ) is the inverse of the saturation mass  
229 concentration  $C^*$  ( $\mu\text{g m}^{-3}$ ),  $C_{\text{OA}}$  is the OA mass loading ( $\mu\text{g m}^{-3}$ ), and  $\alpha$  is the product yield for each corresponding  $K$ . The  
230 fitted values and the literature comparison is shown in Fig. S7, and the  $Y_{\text{SOSiA}}$  have been adjusted for  $\rho_{\text{SOSiA}} = 1.07 \text{ g cm}^{-3}$ .

231

$$232 Y_{\text{SOSiA}} = C_{\text{OA}} \left( \frac{\alpha_1 K_1}{1 + K_1 C_{\text{OA}}} + \frac{\alpha_2 K_2}{1 + K_2 C_{\text{OA}}} \right) \quad (\text{S11})$$

233

234 We fit the 2-product model with the  $\rho_{\text{SOSiA}}$ -adjusted data from Han et al. (2022), Avery et al. (2023), and all literature values  
235 combined, including those we report. The existing literature values and fit 2-product model parameters are summarized in  
236 Tables S9 and S10. As shown in Fig. 4, the 2-product model parameters provided by Charan et al. (2022) are consistent with  
237 those of Han et al. (2022) and Avery et al. (2023) at ambient surface  $C_{\text{OA}}$  (0-30  $\mu\text{g m}^{-3}$ ) with low  $Y_{\text{SOSiA}}$ . However, the 2-  
238 product model fit of Janecek et al. (2019) predicts less volatile products, resulting in higher  $Y_{\text{SOSiA}}$  at those  $C_{\text{OA}}$ . Our 2-product  
239 model fit predicts more volatile products, which is consistent with that of Charan et al. (2022), Han et al. (2022), and Avery et  
240 al. (2023).

241

242 However, for the high  $C_{\text{OA}}$  cases, the literature diverges with experimental  $Y_{\text{SOSiA}}$  ranging from 10 to 100 % at  $\sim 200 \mu\text{g m}^{-3}$ ,  
243 and our  $Y_{\text{SOSiA}}$  yield curve lies between the curves from the literature (Fig. S7). The intercorrelation of  $\text{OH}_{\text{exp}}$  with  $Y_{\text{SOSiA}}$  is  
244 also visible in Fig. S7, where the higher  $Y_{\text{SOSiA}}$  measurements occur not only when  $C_{\text{OA}}$  is high, but also as  $\text{OH}_{\text{exp}}$  increases  
245 (color scale). The 2-product model here does not explicitly account for chemical aging with  $\text{OH}_{\text{exp}}$ , so we use the aging-VBS  
246 approach.

## 247 **S5 Modeling RO<sub>2</sub> Pathways with KinSim**

248 A potential explanation for the  $Y_{\text{SOSiA}}$  discrepancies in the literature is the RO<sub>2</sub> fate, where high [OH] in OFR experiments may  
249 have pushed the RO<sub>2</sub> fate towards a pathway that forms more condensing species. However, Alton and Browne (2022) found



250 in their chamber that  $\text{RO}_2 + \text{HO}_2$ ,  $\text{RO}_2 + \text{NO}$ , and unimolecular pathways would yield similar fractions of siloxanol and formate  
251 ester, suggesting these pathways make similar products, likely through RO; Alton and Browne (2022) suggests that the  
252 dominant products of  $\text{RO}_2 + \text{HO}_2$  are RO, OH, and  $\text{O}_2$ , instead of ROOH.

253  
254 In OFR185, the  $\text{RO}_2 + \text{OH}$  pathway is feasible due to high [OH] and the atmospheric relevance of this pathway is debated  
255 (Peng and Jimenez, 2020). However, Fittschen (2019) suggests that  $\text{RO}_2 + \text{OH}$  is an atmospherically-relevant pathway in low-  
256  $\text{NO}_x$  environments, and the dominant product is expected to be RO (+  $\text{HO}_2$ ). That being said, Assaf et al. (2018) found that the  
257 dominant product of  $\text{RO}_2 + \text{OH}$  is ROOOH for  $\text{RO}_2$  with more than 3 carbon atoms, but we are unaware of any documentation  
258 of siloxane  $\text{RO}_2$  forming ROOOH. The dominance of RO products across  $\text{RO}_2$  fates leading to comparable aerosol mass yields  
259 has been reported with monoterpene nitrate oxidation as well (Day et al., 2022).

260  
261 To assess the  $\text{RO}_2$  fates in these experiments, we adopted analogous reactions from the literature and added those  $\text{RO}_2$  fates  
262 into an OFR mechanism template (Peng and Jimenez, 2020) for KinSim 4.16, a chemical kinetics simulator (Peng and Jimenez,  
263 2019). Table S5 shows the additional  $\text{RO}_2$  reactions and rate coefficients appended to the OFR mechanism. The results suggest  
264 that  $\text{RO}_2 + \text{HO}_2$  and  $\text{RO}_2 + \text{OH}$  pathways dominated across the experiments, but we encountered an issue reconciling the  
265 measured  $\text{OH}_{\text{exp}}$  using Eq. (2) and the  $\text{OH}_{\text{exp}}$  from KinSim.

266  
267 To input the 254 and 185 nm photon fluxes ( $I_{254}$  and  $I_{185}$ ) in KinSim, we followed the recommendations in Rowe et al. (2020)  
268 with  $I_{254\text{max}} = 3.0 \times 10^{15} \text{ cm}^{-2} \text{ s}^{-1}$  and  $I_{185\text{max}}:I_{254\text{max}} = 0.0664$ . Next, we multiplied  $I_{254\text{max}}$  and  $I_{185\text{max}}$  by 0.1 to account for the  
269 shrink wrap lamp covers and by the ratios of the experiment irradiance and  $\text{O}_3$  outputs versus the maximum values at 8V  
270 (Table S6). However, we found that with the above photon flux inputs, KinSim calculated the  $\text{OH}_{\text{exp}}$  to be too high and  $[\text{D}_5]_{\text{final}}$   
271 to be too low, although the modeled  $[\text{O}_3]$  were consistent with measurements (Fig. S9).

272  
273 Given that we were interested in probing the  $\text{RO}_2$  fates, we multiplied  $I_{185}$  and  $I_{254}$  by a factor of 0.1 to bring the  $\text{OH}_{\text{exp}}$  and  
274  $[\text{D}_5]_{\text{final}}$  in line with measurements. We used  $I_{185}$  of  $3 \times 10^{11} - 2 \times 10^{12}$  and  $I_{254}$  of  $1 \times 10^{12} - 3 \times 10^{13} \text{ cm}^{-2} \text{ s}^{-1}$  in the case where  
275  $I_{185}$  and  $I_{254}$  are multiplied by a factor of 0.1, and the initial fluxes are summarized in Table S6. However, this adjustment led  
276 to the output  $[\text{O}_3]$  being underestimated. To assess the impact of the adjustment on  $\text{RO}_2$  fates, we modelled both cases where  
277  $I_{185}$  and  $I_{254}$  are and are not adjusted (Fig. S10).

278  
279 In both UV flux cases, KinSim found  $\text{RO}_2 + \text{HO}_2$  and  $\text{RO}_2 + \text{OH}$  to be the dominant reaction pathways across the experiments  
280 (Fig. S10). A potential explanation for the  $\text{OH}_{\text{exp}}$  discrepancy is the formation of secondary products that are also reactive with  
281 OH, which are not included in  $\text{OHR}_{\text{ext}}$  calculated with injected  $\text{D}_5$ . Since we observed the formation of OH-reactive species  
282 like HCHO and the proposed VOP appear to be removed with  $\text{OH}_{\text{exp}}$ , we suspect that the KinSim mechanism is incomplete,  
283 and that a more complete mechanism with subsequent OH-reactive species should improve the KinSim calculations.

284

285 For these experiments, we expected  $\text{RO}_2 + \text{HO}_2$  and  $\text{RO}_2 + \text{OH}$  to have been the dominant pathways across the experiments,  
286 based on the findings by Alton and Browne (2022) and the KinSim calculations. Avery et al. (2023) also found similar  $\text{RO}_2$   
287 fates with KinSim for their experiments, and the common product of these pathways is RO. We note that the inclusion of VOP  
288 into the OFR mechanism or when calculating  $\text{OHR}_{\text{ext}}$  may be needed to reconcile measured  $\text{OH}_{\text{exp}}$  and model expectations.  
289 Peng and Jimenez (2020) suggest that using measured  $\text{OH}_{\text{exp}}$  is preferred over modelled values due to uncertainties in the OFR  
290 residence time, mixing, and OH recycling. We also used  $\text{RO}_2$  reactions and rate coefficients in the OFR mechanism based on  
291 those of organics, and that the  $\text{RO}_2$  fates are subject to change as the  $\text{D}_5 + \text{OH}$  system is further constrained.

## 292 **References**

293 Alton, M. W. and Browne, E. C.: Atmospheric Chemistry of Volatile Methyl Siloxanes: Kinetics and Products of Oxidation  
294 by OH Radicals and Cl Atoms, *Environ Sci Technol*, 54, 5992–5999, <https://doi.org/10.1021/acs.est.0c01368>, 2020.

295

296 Alton, M. W. and Browne, E. C.: Atmospheric Degradation of Cyclic Volatile Methyl Siloxanes: Radical Chemistry and  
297 Oxidation Products, *ACS Environmental Au*, <https://doi.org/10.1021/acsenvironau.1c00043>, 2022.

298

299 Asbach, C., Kaminski, H., Lamboy, Y., Schneiderwind, U., Fierz, M., and Todea, A. M.: Silicone sampling tubes can cause  
300 drastic artifacts in measurements with aerosol instrumentation based on unipolar diffusion charging, *Aerosol Science and*  
301 *Technology*, 50, 1375–1384, <https://doi.org/10.1080/02786826.2016.1241858>, 2016.

302

303 Assaf, E., Schoemaeker, C., Vereecken, L., and Fittschen, C.: Experimental and theoretical investigation of the reaction of  
304  $\text{RO}_2$  radicals with OH radicals: Dependence of the  $\text{HO}_2$  yield on the size of the alkyl group, *Int J Chem Kinet*, 50, 670–680,  
305 <https://doi.org/https://doi.org/10.1002/kin.21191>, 2018.

306

307 Atkinson, R.: Kinetics of the gas-phase reactions of a series of organosilicon compounds with hydroxyl and nitrate( $\text{NO}_3$ )  
308 radicals and ozone at 297 +/- 2 K, *Environ Sci Technol*, 25, 863–866, <https://doi.org/10.1021/es00017a005>, 1991.

309

310 Atkinson, R., Baulch, D. L., Cox, R. A., Crowley, J. N., Hampson, R. F., Hynes, R. G., Jenkin, M. E., Rossi, M. J., Troe, J.,  
311 and Subcommittee, I.: Evaluated kinetic and photochemical data for atmospheric chemistry: Volume II &ndash; gas phase  
312 reactions of organic species, *Atmos Chem Phys*, 6, 3625–4055, <https://doi.org/10.5194/acp-6-3625-2006>, 2006.

313

314 Avery, A. M., Alton, M. W., Canagaratna, M. R., Krechmer, J. E., Sueper, D. T., Bhattacharyya, N., Hildebrandt Ruiz, L.,  
315 Brune, W. H., and Lambe, A. T.: Comparison of the Yield and Chemical Composition of Secondary Organic Aerosol

316 Generated from the OH and Cl Oxidation of Decamethylcyclopentasiloxane, ACS Earth Space Chem,  
317 <https://doi.org/10.1021/acsearthspacechem.2c00304>, 2023.

318

319 Baasandorj, M., Millet, D. B., Hu, L., Mitroo, D., and Williams, B. J.: Measuring acetic and formic acid by proton-transfer-  
320 reaction mass spectrometry: sensitivity, humidity dependence, and quantifying interferences, Atmos Meas Tech, 8, 1303–  
321 1321, <https://doi.org/10.5194/amt-8-1303-2015>, 2015.

322

323 Brown, P., Watts, P., Märk, T. D., and Mayhew, C. A.: Proton transfer reaction mass spectrometry investigations on the effects  
324 of reduced electric field and reagent ion internal energy on product ion branching ratios for a series of saturated alcohols, Int  
325 J Mass Spectrom, 294, 103–111, <https://doi.org/https://doi.org/10.1016/j.ijms.2010.05.028>, 2010.

326

327 Charan, S. M., Huang, Y., Buenconsejo, R. S., Li, Q., Cocker III, D. R., and Seinfeld, J. H.: Secondary organic aerosol  
328 formation from the oxidation of decamethylcyclopentasiloxane at atmospherically relevant OH concentrations, Atmos Chem  
329 Phys, 22, 917–928, <https://doi.org/10.5194/acp-22-917-2022>, 2022.

330

331 Coggon, M. M., McDonald, B. C., Vlasenko, A., Veres, P. R., Bernard, F., Koss, A. R., Yuan, B., Gilman, J. B., Peischl, J.,  
332 Aikin, K. C., DuRant, J., Warneke, C., Li, S.-M., and de Gouw, J. A.: Diurnal Variability and Emission Pattern of  
333 Decamethylcyclopentasiloxane (D5) from the Application of Personal Care Products in Two North American Cities, Environ  
334 Sci Technol, 52, 5610–5618, <https://doi.org/10.1021/acs.est.8b00506>, 2018.

335

336 Day, D. A., Fry, J. L., Kang, H. G., Krechmer, J. E., Ayres, B. R., Keehan, N. I., Thompson, S. L., Hu, W., Campuzano-Jost,  
337 P., Schroder, J. C., Stark, H., DeVault, M. P., Ziemann, P. J., Zarzana, K. J., Wild, R. J., Dubè, W. P., Brown, S. S., and  
338 Jimenez, J. L.: Secondary Organic Aerosol Mass Yields from NO<sub>3</sub> Oxidation of  $\alpha$ -Pinene and  $\Delta$ -Carene: Effect of RO<sub>2</sub> Radical  
339 Fate, J Phys Chem A, 126, 7309–7330, <https://doi.org/10.1021/acs.jpca.2c04419>, 2022.

340

341 Dee, G. T., Ougizawa, T., and Walsh, D. J.: The pressure-volume-temperature properties of polyethylene, poly(dimethyl  
342 siloxane), poly(ethylene glycol) and poly(propylene glycol) as a function of molecular weight, Polymer (Guildf), 33, 3462–  
343 3469, [https://doi.org/https://doi.org/10.1016/0032-3861\(92\)91104-A](https://doi.org/https://doi.org/10.1016/0032-3861(92)91104-A), 1992.

344

345 Demarcke, M., Amelynck, C., Schoon, N., Dhooghe, F., Rimetz-Planchon, J., van Langenhove, H., and Dewulf, J.: Laboratory  
346 studies in support of the detection of biogenic unsaturated alcohols by proton transfer reaction-mass spectrometry, Int J Mass  
347 Spectrom, 290, 14–21, <https://doi.org/https://doi.org/10.1016/j.ijms.2009.11.005>, 2010.

348

349 Dewil, R., Appels, L., and Baeyens, J.: Energy use of biogas hampered by the presence of siloxanes, *Energy Convers Manag*,  
350 47, 1711–1722, <https://doi.org/https://doi.org/10.1016/j.enconman.2005.10.016>, 2006.

351

352 Fittschen, C.: The reaction of peroxy radicals with OH radicals, *Chem Phys Lett*, 725, 102–108,  
353 <https://doi.org/https://doi.org/10.1016/j.cplett.2019.04.002>, 2019.

354

355 Franco, B., Blumenstock, T., Cho, C., Clarisse, L., Clerbaux, C., Coheur, P.-F., de Mazière, M., de Smedt, I., Dorn, H.-P.,  
356 Emmerichs, T., Fuchs, H., Gkatzelis, G., Griffith, D. W. T., Gromov, S., Hannigan, J. W., Hase, F., Hohaus, T., Jones, N.,  
357 Kerkweg, A., Kiendler-Scharr, A., Lutsch, E., Mahieu, E., Novelli, A., Ortega, I., Paton-Walsh, C., Pommier, M., Pozzer, A.,  
358 Reimer, D., Rosanka, S., Sander, R., Schneider, M., Strong, K., Tillmann, R., van Roozendaal, M., Vereecken, L., Vigouroux,  
359 C., Wahner, A., and Taraborrelli, D.: Ubiquitous atmospheric production of organic acids mediated by cloud droplets, *Nature*,  
360 593, 233–237, <https://doi.org/10.1038/s41586-021-03462-x>, 2021.

361

362 Fytas, G. and Wang, C. H.: Studies of siloxane oligomers by depolarized Rayleigh scattering, *J Am Chem Soc*, 106, 4392–  
363 4396, <https://doi.org/10.1021/ja00328a017>, 1984.

364

365 Han, C., Yang, H., Li, K., Lee, P., Liggio, J., Leithead, A., and Li, S.-M.: Secondary organic aerosols from OH oxidation of  
366 cyclic volatile methyl siloxanes as an important Si source in the atmosphere, *Atmos Chem Phys*, 22, 10827–10839,  
367 <https://doi.org/10.5194/acp-22-10827-2022>, 2022.

368

369 Hazra, M. K., Francisco, J. S., and Sinha, A.: Gas Phase Hydrolysis of Formaldehyde To Form Methanediol: Impact of Formic  
370 Acid Catalysis, *J Phys Chem A*, 117, 11704–11710, <https://doi.org/10.1021/jp4008043>, 2013.

371

372 He, X. W., Widmaier, J. M., Herz, J. E., and Meyer, G. C.: Competition between polycondensation of  $\alpha,\omega$ -dihydroxy  
373 polydimethylsiloxane and its condensation with alkoxy silane: A kinetic approach, *Eur Polym J*, 24, 1145–1148,  
374 [https://doi.org/https://doi.org/10.1016/0014-3057\(88\)90100-0](https://doi.org/https://doi.org/10.1016/0014-3057(88)90100-0), 1988.

375

376 Janecek, N. J., Marek, R. F., Bryngelson, N., Singh, A., Bullard, R. L., Brune, W. H., and Stanier, C. O.: Physical properties  
377 of secondary photochemical aerosol from OH oxidation of a cyclic siloxane, *Atmos Chem Phys*, 19, 1649–1664,  
378 <https://doi.org/10.5194/acp-19-1649-2019>, 2019.

379

380 Kim, J. and Xu, S.: Quantitative structure-reactivity relationships of hydroxyl radical rate constants for linear and cyclic volatile  
381 methylsiloxanes, *Environ Toxicol Chem*, 36, 3240–3245, <https://doi.org/https://doi.org/10.1002/etc.3914>, 2017.

382

383 Kuwata, M., Zorn, S. R., and Martin, S. T.: Using Elemental Ratios to Predict the Density of Organic Material Composed of  
384 Carbon, Hydrogen, and Oxygen, *Environ Sci Technol*, 46, 787–794, <https://doi.org/10.1021/es202525q>, 2012.

385

386 Lamers, B. A. G., de Waal, B. F. M., and Meijer, E. W.: The iterative synthesis of discrete dimethylsiloxane oligomers: A  
387 practical guide, *Journal of Polymer Science*, 59, 1142–1150, <https://doi.org/10.1002/pol.20200649>, 2021.

388

389 Li, H., Almeida, T. G., Luo, Y., Zhao, J., Palm, B. B., Daub, C. D., Huang, W., Mohr, C., Krechmer, J. E., Kurtén, T., and  
390 Ehn, M.: Fragmentation inside proton-transfer-reaction-based mass spectrometers limits the detection of ROOR and ROOH  
391 peroxides, *Atmos Meas Tech*, 15, 1811–1827, <https://doi.org/10.5194/amt-15-1811-2022>, 2022.

392

393 Liu, X., Day, D. A., Krechmer, J. E., Brown, W., Peng, Z., Ziemann, P. J., and Jimenez, J. L.: Direct measurements of semi-  
394 volatile organic compound dynamics show near-unity mass accommodation coefficients for diverse aerosols, *Commun Chem*,  
395 2, 98, <https://doi.org/10.1038/s42004-019-0200-x>, 2019.

396

397 Mazzoni, S. M., Roy, S., and Grigoras, S.: Eco-Relevant Properties of Selected Organosilicon Materials, in: *Organosilicon*  
398 *Materials*, edited by: Chandra, G., Springer Berlin Heidelberg, Berlin, Heidelberg, 53–81, [https://doi.org/10.1007/978-3-540-](https://doi.org/10.1007/978-3-540-68331-5_3)  
399 [68331-5\\_3](https://doi.org/10.1007/978-3-540-68331-5_3), 1997.

400

401 Nakao, S., Tang, P., Tang, X., Clark, C. H., Qi, L., Seo, E., Asa-Awuku, A., and Cocker, D.: Density and elemental ratios of  
402 secondary organic aerosol: Application of a density prediction method, *Atmos Environ*, 68, 273–277,  
403 <https://doi.org/10.1016/j.atmosenv.2012.11.006>, 2013.

404

405 Odum, J. R., Hoffmann, T., Bowman, F., Collins, D., Flagan, R. C., and Seinfeld, J. H.: Gas/Particle Partitioning and Secondary  
406 Organic Aerosol Yields, *Environ Sci Technol*, 30, 2580–2585, <https://doi.org/10.1021/es950943+>, 1996.

407

408 Otkjær, R. V., Jakobsen, H. H., Tram, C. M., and Kjaergaard, H. G.: Calculated Hydrogen Shift Rate Constants in Substituted  
409 Alkyl Peroxy Radicals, *J Phys Chem A*, 122, 8665–8673, <https://doi.org/10.1021/acs.jpca.8b06223>, 2018.

410

411 Palm, B. B., Campuzano-Jost, P., Ortega, A. M., Day, D. A., Kaser, L., Jud, W., Karl, T., Hansel, A., Hunter, J. F., Cross, E.  
412 S., Kroll, J. H., Peng, Z., Brune, W. H., and Jimenez, J. L.: In situ secondary organic aerosol formation from ambient pine  
413 forest air using an oxidation flow reactor, *Atmos Chem Phys*, 16, 2943–2970, <https://doi.org/10.5194/acp-16-2943-2016>, 2016.

414

415 Peng, Z. and Jimenez, J. L.: KinSim: A Research-Grade, User-Friendly, Visual Kinetics Simulator for Chemical-Kinetics and  
416 Environmental-Chemistry Teaching, *J Chem Educ*, 96, 806–811, <https://doi.org/10.1021/acs.jchemed.9b00033>, 2019.

417  
418 Peng, Z. and Jimenez, J. L.: Radical chemistry in oxidation flow reactors for atmospheric chemistry research, *Chem. Soc. Rev.*,  
419 49, 2570–2616, <https://doi.org/10.1039/C9CS00766K>, 2020.  
420  
421 Rowe, J. P., Lambe, A. T., and Brune, W. H.: Technical Note: Effect of varying the  $\lambda=185$  and 254nm photon flux ratio on  
422 radical generation in oxidation flow reactors, *Atmos Chem Phys*, 20, 13417–13424, [https://doi.org/10.5194/acp-20-13417-](https://doi.org/10.5194/acp-20-13417-2020)  
423 2020, 2020.  
424  
425 Safron, A., Strandell, M., Kierkegaard, A., and Macleod, M.: Rate Constants and Activation Energies for Gas-Phase Reactions  
426 of Three Cyclic Volatile Methyl Siloxanes with the Hydroxyl Radical, *Int J Chem Kinet*, 47, 420–428,  
427 <https://doi.org/https://doi.org/10.1002/kin.20919>, 2015.  
428  
429 Seinfeld, J. H. and Pandis, S. N.: *Atmospheric Chemistry and Physics: From Air Pollution to Climate Change*, 1203 pp., 2006.  
430  
431 Timko, M. T., Yu, Z., Kroll, J., Jayne, J. T., Worsnop, D. R., Miake-Lye, R. C., Onasch, T. B., Liscinsky, D., Kirchstetter, T.  
432 W., Destailhats, H., Holder, A. L., Smith, J. D., and Wilson, K. R.: Sampling Artifacts from Conductive Silicone Tubing,  
433 *Aerosol Science and Technology*, 43, 855–865, <https://doi.org/10.1080/02786820902984811>, 2009.  
434  
435 Vlasenko, A., Macdonald, A. M., Sjostedt, S. J., and Abbatt, J. P. D.: Formaldehyde measurements by Proton transfer reaction  
436 – Mass Spectrometry (PTR-MS): correction for humidity effects, *Atmos Meas Tech*, 3, 1055–1062,  
437 <https://doi.org/10.5194/amt-3-1055-2010>, 2010.  
438  
439 von der Weiden, S.-L., Drewnick, F., and Borrmann, S.: Particle Loss Calculator – a new software tool for the assessment of  
440 the performance of aerosol inlet systems, *Atmos Meas Tech*, 2, 479–494, <https://doi.org/10.5194/amt-2-479-2009>, 2009.  
441  
442 Wu, Y. and Johnston, M. V: Aerosol Formation from OH Oxidation of the Volatile Cyclic Methyl Siloxane (cVMS)  
443 Decamethylcyclopentasiloxane, *Environ Sci Technol*, 51, 4445–4451, <https://doi.org/10.1021/acs.est.7b00655>, 2017.  
444  
445 Xiao, R., Zammit, I., Wei, Z., Hu, W.-P., MacLeod, M., and Spinney, R.: Kinetics and Mechanism of the Oxidation of Cyclic  
446 Methylsiloxanes by Hydroxyl Radical in the Gas Phase: An Experimental and Theoretical Study, *Environ Sci Technol*, 49,  
447 13322–13330, <https://doi.org/10.1021/acs.est.5b03744>, 2015.  
448

449 Yu, Y., Liz Alexander, M., Perraud, V., Bruns, E. A., Johnson, S. N., Ezell, M. J., and Finlayson-Pitts, B. J.: Contamination  
450 from electrically conductive silicone tubing during aerosol chemical analysis, *Atmos Environ*, 43, 2836–2839,  
451 <https://doi.org/https://doi.org/10.1016/j.atmosenv.2009.02.014>, 2009.

452

453 Ziemann, P. J. and Atkinson, R.: Kinetics, products, and mechanisms of secondary organic aerosol formation, *Chem Soc Rev*,  
454 41, 6582, <https://doi.org/10.1039/c2cs35122f>, 2012.

455

456

457

458

459

460

461

462

463

464

465

466

467

468

469

470

471

472

473

474

475

476

477

478

479

480

481

482 **Table S1. Summary of literature D<sub>5</sub> + OH rate coefficients and measurement methods. We used the empirical values to calculate the**  
 483 **average  $k_{D_5+OH}$ . GC-FID: gas chromatography-flame ionization detector. GC-MS: gas chromatography-mass spectrometry. CIMS:**  
 484 **chemical ionization mass spectrometry.**

| Reference               | Method                                                                                                                     | $k_{D_5+OH}$ at ~298 K (cm <sup>3</sup> s <sup>-1</sup> ) |
|-------------------------|----------------------------------------------------------------------------------------------------------------------------|-----------------------------------------------------------|
| Atkinson (1991)         | CH <sub>3</sub> NO <sub>2</sub> + UV in 6400 L Teflon chamber, GC-FID, rate relative to cyclohexane.                       | $1.55 \times 10^{-12}$                                    |
| Safron et al. (2015)    | O <sub>3</sub> /H <sub>2</sub> O + UV in 140 mL quartz chamber, GC-MS, rate relative to cyclohexane.                       | $2.6 \times 10^{-12}$                                     |
| Xiao et al. (2015)      | O <sub>3</sub> /H <sub>2</sub> O + UV in 140 mL quartz chamber, GC-MS, rate relative to trimethylpentane.                  | $2.46 \times 10^{-12}$                                    |
|                         | Computed with Spartan 10 and Merck Molecular Force Field molecular mechanics.                                              | <del><math>2.90 \times 10^{-12}</math></del>              |
| Kim and Xu (2017)       | O <sub>3</sub> /H <sub>2</sub> O + UV in 134 L SilcoNert-coated stainless steel chamber, GC-MS, rate relative to n-hexane. | $1.46 \times 10^{-12}$                                    |
| Alton and Browne (2020) | O <sub>3</sub> /H <sub>2</sub> O + UV in 1000 L Teflon chamber, CIMS, rate relative to propionic acid/MEK.                 | $2.1 \times 10^{-12}$                                     |
| <b>Average</b>          |                                                                                                                            | <b><math>2.0 \times 10^{-12}</math></b>                   |

485  
 486  
 487  
 488  
 489  
 490  
 491  
 492  
 493  
 494  
 495  
 496  
 497  
 498  
 499  
 500  
 501



502 Table S2. Summary of PAM OFR experiment conditions.

| Experiment | $\tau_{\text{res}}$<br>(sec) | Lamp<br>Voltage | RH<br>(%)        | T<br>(°C)        | O <sub>3</sub><br>(ppm) | Irradiance<br>( $\mu\text{W cm}^{-2}$ ) | Volumetric mode<br>(nm) | Surface mode<br>(nm) | Aerosol sampling<br>line loss (%) | Particle<br>number<br>concentration<br>( $\text{cm}^{-3}$ ) |
|------------|------------------------------|-----------------|------------------|------------------|-------------------------|-----------------------------------------|-------------------------|----------------------|-----------------------------------|-------------------------------------------------------------|
| 1          | 180                          | 2.4             | 33.2<br>7 ± 0.07 | 22.4<br>4 ± 0.07 | 2.18 ± 0.02             | 0.95 ± 0.05                             | 68.5                    | 57.3                 | 8.49                              | 9.17 × 10 <sup>4</sup>                                      |
| 2          | 180                          | 2.4             | 33.5<br>3 ± 0.07 | 21.0<br>9 ± 0.09 | 2.37 ± 0.02             | 0.93 ± 0.05                             | 85.1                    | 66.1                 | 6.74                              | 1.21 × 10 <sup>5</sup>                                      |
| 3          | 180                          | 2.4             | 32.4<br>5 ± 0.03 | 19.8<br>4 ± 0.16 | 2.29 ± 0.03             | 0.83 ± 0.08                             | 82                      | 66.1                 | 6.96                              | 1.34 × 10 <sup>5</sup>                                      |
| 4          | 180                          | 2.4             | 82.4<br>7 ± 0.20 | 20.3<br>9 ± 0.12 | 1.80 ± 0.02             | 0.56 ± 0.05                             | 98.2                    | 79.1                 | 5.82                              | 3.24 × 10 <sup>5</sup>                                      |
| 5          | 180                          | 2.4             | 81.9<br>6 ± 0.11 | 21.3<br>7 ± 0.08 | 1.98 ± 0.03             | 0.84 ± 0.08                             | 131                     | 101.8                | 4.33                              | 3.83 × 10 <sup>5</sup>                                      |
| 6          | 180                          | 2.4             | 82.3<br>4 ± 0.11 | 21.5<br>7 ± 0.06 | 1.82 ± 0.02             | 0.61 ± 0.03                             | 151.2                   | 121.9                | 3.80                              | 3.83 × 10 <sup>5</sup>                                      |
| 7          | 180                          | 8.0             | 28.6<br>7 ± 0.30 | 21.6<br>6 ± 0.22 | 12.62 ± 0.15            | 12.36 ± 0.11                            | 88.2                    | 71                   | 6.52                              | 1.60 × 10 <sup>5</sup>                                      |
| 8          | 180                          | 8.0             | 28.8<br>2 ± 0.16 | 21.6<br>3 ± 0.22 | 10.65 ± 0.12            | 9.37 ± 0.11                             | 140.7                   | 113.4                | 4.02                              | 1.84 × 10 <sup>5</sup>                                      |
| 9          | 180                          | 8.0             | 28.5<br>8 ± 0.17 | 23.0<br>8 ± 0.19 | 11.04 ± 0.05            | 9.80 ± 0.07                             | 187.7                   | 145.9                | 3.15                              | 2.14 × 10 <sup>5</sup>                                      |

|    |     |     |                     |                     |                |                 |       |       |      |                        |
|----|-----|-----|---------------------|---------------------|----------------|-----------------|-------|-------|------|------------------------|
| 10 | 180 | 8.0 | 75.6<br>2 ±<br>0.51 | 21.6<br>1 ±<br>0.29 | 8.88 ±<br>0.08 | 12.18 ±<br>0.08 | 121.9 | 101.8 | 4.67 | 4.62 × 10 <sup>5</sup> |
| 11 | 180 | 8.0 | 74.9<br>1 ±<br>0.33 | 23.0<br>3 ±<br>0.18 | 8.00 ±<br>0.06 | 9.68 ± 0.06     | 151.2 | 117.6 | 3.80 | 5.18 × 10 <sup>5</sup> |
| 12 | 180 | 8.0 | 75.6<br>4 ±<br>0.34 | 23.4<br>0 ±<br>0.20 | 8.03 ±<br>0.04 | 9.67 ± 0.10     | 194.6 | 151.2 | 3.04 | 6.64 × 10 <sup>5</sup> |
| 13 | 120 | 2.4 | 30.5<br>7 ±<br>0.13 | 20.1<br>5 ±<br>0.14 | 1.69 ±<br>0.01 | 0.87 ± 0.03     | 51.4  | 42.9  | 11.7 | 6.30 × 10 <sup>4</sup> |
| 14 | 120 | 2.4 | 28.9<br>7 ±<br>0.07 | 21.1<br>6 ±<br>0.08 | 1.62 ±<br>0.01 | 0.84 ± 0.06     | 55.2  | 47.8  | 10.7 | 5.56 × 10 <sup>4</sup> |
| 15 | 120 | 2.4 | 28.4<br>8 ±<br>0.05 | 21.1<br>0 ±<br>0.06 | 1.54 ±<br>0.01 | 0.69 ± 0.05     | 57.3  | 49.6  | 10.4 | 4.39 × 10 <sup>4</sup> |

503

504

505

506

507

508

509

510

511

512

513

514

515

516

517

518

519 **Table S3. Summary of experiment condensational sinks, LVOC condensation lifetimes, and growth factors calculated with the**  
 520 **particle size distribution exiting the PAM-OFR as described in Section S1.3.**

| Parameters | SOA, LVOC<br>$\kappa = 0.13, M = 0.200 \text{ kg mol}^{-1}$ |                       |                 | SOSiA, D <sub>s</sub><br>$\kappa = 0.01, M = 0.370 \text{ kg mol}^{-1}$ |                       |                 |
|------------|-------------------------------------------------------------|-----------------------|-----------------|-------------------------------------------------------------------------|-----------------------|-----------------|
|            | Experiment                                                  | CS (m <sup>-2</sup> ) | $\tau_{CS}$ (s) | Growth Factor                                                           | CS (m <sup>-2</sup> ) | $\tau_{CS}$ (s) |
| 1          | 18237                                                       | 0.62335               | 1.0212          | 13283                                                                   | 0.85585               | 1.0017          |
| 2          | 28655                                                       | 0.39672               | 1.0214          | 20968                                                                   | 0.54217               | 1.0017          |
| 3          | 27584                                                       | 0.41214               | 1.0204          | 20183                                                                   | 0.56327               | 1.0016          |
| 4          | 126160                                                      | 0.090109              | 1.1724          | 73844                                                                   | 0.15395               | 1.0154          |
| 5          | 221320                                                      | 0.051365              | 1.1673          | 132820                                                                  | 0.085589              | 1.0149          |
| 6          | 284510                                                      | 0.039958              | 1.1711          | 172260                                                                  | 0.065996              | 1.0153          |
| 7          | 48329                                                       | 0.23523               | 1.0171          | 35800                                                                   | 0.31754               | 1.0013          |
| 8          | 100390                                                      | 0.11324               | 1.0173          | 75748                                                                   | 0.15008               | 1.0014          |
| 9          | 180880                                                      | 0.062851              | 1.0171          | 138940                                                                  | 0.081818              | 1.0013          |
| 10         | 240210                                                      | 0.047326              | 1.1196          | 153930                                                                  | 0.073853              | 1.0102          |
| 11         | 372690                                                      | 0.030503              | 1.1155          | 243900                                                                  | 0.046611              | 1.0099          |
| 12         | 661010                                                      | 0.017198              | 1.1197          | 437730                                                                  | 0.025971              | 1.0102          |
| 13         | 8963.6                                                      | 1.2683                | 1.0187          | 6506.9                                                                  | 1.7471                | 1.0015          |
| 14         | 8894.4                                                      | 1.2781                | 1.0174          | 6483.8                                                                  | 1.7533                | 1.0014          |
| 15         | 7333.8                                                      | 1.5501                | 1.0170          | 5353.1                                                                  | 2.1237                | 1.0013          |

521

522

523

524

525

526

527

528

529

530

531

532

533

534 **Table S4. Proposed PTR-MS VOP ions and identities. Here, “D” refers to units of (CH<sub>3</sub>)<sub>2</sub>SiO and “T” to CH<sub>3</sub>SiO.**

| <b>Ion Formula</b>                                                              | <b>Ion Unit Mass (<i>m/z</i>)</b> | <b>Description</b>                                                                 |
|---------------------------------------------------------------------------------|-----------------------------------|------------------------------------------------------------------------------------|
| (HCHO)H <sup>+</sup>                                                            | 31                                | Formaldehyde                                                                       |
| (HCOOH)H <sup>+</sup>                                                           | 47                                | Formic acid                                                                        |
| (C <sub>9</sub> H <sub>27</sub> O <sub>5</sub> Si <sub>5</sub> ) <sup>+</sup>   | 355                               | D <sub>5</sub> (-CH <sub>3</sub> ) or D <sub>4</sub> T-OH (-OH) fragment ion       |
| (C <sub>8</sub> H <sub>25</sub> O <sub>6</sub> Si <sub>5</sub> ) <sup>+</sup>   | 357                               | D <sub>3</sub> T <sub>2</sub> -(OH) <sub>2</sub> (-OH) fragment ion                |
| (C <sub>10</sub> H <sub>30</sub> O <sub>5</sub> Si <sub>5</sub> )H <sup>+</sup> | 371                               | D <sub>5</sub> dominant isotope                                                    |
| (C <sub>9</sub> H <sub>28</sub> O <sub>6</sub> Si <sub>5</sub> )H <sup>+</sup>  | 373                               | D <sub>4</sub> T-OH dominant isotope or H <sub>2</sub> O cluster of <i>m/z</i> 355 |
| (C <sub>8</sub> H <sub>26</sub> O <sub>7</sub> Si <sub>5</sub> )H <sup>+</sup>  | 375                               | D <sub>3</sub> T <sub>2</sub> -(OH) <sub>2</sub> dominant isotope                  |
| (C <sub>9</sub> H <sub>25</sub> O <sub>7</sub> Si <sub>5</sub> ) <sup>+</sup>   | 385                               | D <sub>3</sub> T <sub>2</sub> -OH-OCHO (-OH) fragment ion                          |
| (C <sub>10</sub> H <sub>28</sub> O <sub>7</sub> Si <sub>5</sub> )H <sup>+</sup> | 401                               | D <sub>4</sub> T-OCHO dominant isotope                                             |

535

536

537

538

539

540

541

542

543

544

545

546

547

548

549

550

551

552

553

554

555

556 **Table S5. Reactions and rate coefficients added to the KinSim OFR mechanism template. The rate coefficients ( $k$ ) have units of  $\text{cm}^3$**   
 557  **$\text{s}^{-1}$  and  $\text{s}^{-1}$  for bimolecular and unimolecular reactions respectively. Ziemann and Atkinson (2012) notes that the rates of  $\text{RO}_2 + \text{RO}_2$**   
 558 **varies by orders of magnitude depending on the structure of the  $\text{RO}_2$  and that the products are uncertain. Here, we assumed that**  
 559 **the initial  $\text{RO}_2$  from  $\text{D}_5 + \text{OH}$  is analogous to secondary alkyl  $\text{RO}_2$ . Alton and Browne (2022) proposes the majority product of  $\text{RO}_2 +$**   
 560  **$\text{HO}_2$  is  $\text{RO}$ . The  $\text{RO}_2 + \text{OH}$  rate is for the propylperoxy radical (Fittschen, 2019). For isomerization, we used a value in the range of**  
 561 **calculated 1,5 H-shift rates in alkanes, which can vary by orders of magnitude depending on the molecule's functionalization (Otkjær**  
 562 **et al., 2018).**

| Reference                   | Reaction                    | Products                                                                                    | $k$                   |
|-----------------------------|-----------------------------|---------------------------------------------------------------------------------------------|-----------------------|
| Alton and Browne (2022)     | $\text{RO}_2 + \text{HO}_2$ | $\text{RO} + \text{O}_2 + \text{OH}$ (90 %)<br>$\text{ROOH}$ (10 %)                         | $1.7 \times 10^{-11}$ |
| Ziemann and Atkinson (2012) | $\text{RO}_2 + \text{RO}_2$ | $\text{ROH} + \text{R}=\text{O}$<br>$2\text{RO} + \text{O}_2$<br>$\text{ROOR} + \text{O}_2$ | $5 \times 10^{-15}$   |
| Fittschen (2019)            | $\text{RO}_2 + \text{OH}$   | $\text{ROOOH}$<br>$\text{RO} + \text{HO}_2$                                                 | $1.4 \times 10^{-10}$ |
| Alton and Browne (2022)     | $\text{RO}_2$ rearrangement | $\text{RO} + \text{HCHO}$                                                                   | $8.0 \times 10^{-3}$  |
| Otkjær et al. (2018)        | $\text{RO}_2$ isomerization | $\text{R}'\text{O}_2$                                                                       | $1 \times 10^{-3}$    |
| Atkinson et al. (2006)      | $\text{HCHO} + \text{OH}$   | $\text{HO}_2 + \text{CO}$                                                                   | $8.5 \times 10^{-12}$ |
| Atkinson et al. (2006)      | $\text{CO} + \text{OH}$     | $\text{HO}_2 + \text{CO}_2$                                                                 | $1.5 \times 10^{-13}$ |

563

564

565

566

567

568

569

570

571

572

573

574

575

576

577

578

579

580 **Table S6. Input UV fluxes ( $\text{cm}^{-2} \text{s}^{-1}$ ) for KinSim.**

| Experiment | [O <sub>3</sub> ] matched |                        | OH <sub>exp</sub> matched |                        |
|------------|---------------------------|------------------------|---------------------------|------------------------|
|            | I <sub>185</sub>          | I <sub>254</sub>       | I <sub>185</sub>          | I <sub>254</sub>       |
| 1          | $3.441 \times 10^{12}$    | $2.375 \times 10^{13}$ | $3.441 \times 10^{11}$    | $2.375 \times 10^{12}$ |
| 2          | $3.741 \times 10^{12}$    | $2.325 \times 10^{13}$ | $3.741 \times 10^{11}$    | $2.325 \times 10^{12}$ |
| 3          | $3.615 \times 10^{12}$    | $2.075 \times 10^{13}$ | $3.615 \times 10^{11}$    | $2.075 \times 10^{12}$ |
| 4          | $4.038 \times 10^{12}$    | $1.400 \times 10^{13}$ | $4.038 \times 10^{11}$    | $1.400 \times 10^{12}$ |
| 5          | $4.442 \times 10^{12}$    | $2.100 \times 10^{13}$ | $4.442 \times 10^{11}$    | $2.100 \times 10^{12}$ |
| 6          | $4.083 \times 10^{12}$    | $1.525 \times 10^{13}$ | $4.083 \times 10^{11}$    | $1.525 \times 10^{12}$ |
| 7          | $1.992 \times 10^{13}$    | $3.090 \times 10^{14}$ | $1.992 \times 10^{12}$    | $3.090 \times 10^{13}$ |
| 8          | $1.681 \times 10^{13}$    | $2.343 \times 10^{14}$ | $1.681 \times 10^{12}$    | $2.343 \times 10^{13}$ |
| 9          | $1.743 \times 10^{13}$    | $2.450 \times 10^{14}$ | $1.743 \times 10^{12}$    | $2.450 \times 10^{13}$ |
| 10         | $1.992 \times 10^{13}$    | $3.045 \times 10^{14}$ | $1.992 \times 10^{12}$    | $3.045 \times 10^{13}$ |
| 11         | $1.795 \times 10^{13}$    | $2.420 \times 10^{14}$ | $1.795 \times 10^{12}$    | $2.420 \times 10^{13}$ |
| 12         | $1.801 \times 10^{13}$    | $2.418 \times 10^{14}$ | $1.801 \times 10^{12}$    | $2.418 \times 10^{13}$ |
| 13         | $5.534 \times 10^{12}$    | $2.175 \times 10^{13}$ | $5.534 \times 10^{11}$    | $2.175 \times 10^{12}$ |
| 14         | $5.304 \times 10^{12}$    | $2.100 \times 10^{13}$ | $5.304 \times 10^{11}$    | $2.100 \times 10^{12}$ |
| 15         | $5.042 \times 10^{12}$    | $1.725 \times 10^{13}$ | $5.042 \times 10^{11}$    | $1.725 \times 10^{12}$ |

581

582

583

584

585

586

587

588

589

590

591

592

593

594

595

596 **Table S7. Fit first generation relative molar yield ( $\gamma_i$ ) and  $k_{\text{VOP}i+\text{OH}}$  of proposed VOP identities. Here, “D” refers to units of  $(\text{CH}_3)_2\text{SiO}$**   
597 **and “T” to  $\text{CH}_3\text{SiO}$ .**

| <b>Proposed VOP</b>                                                | $\gamma_i$ | $k_{\text{VOP}i+\text{OH}} (\text{cm}^3 \text{s}^{-1})$ |
|--------------------------------------------------------------------|------------|---------------------------------------------------------|
| D <sub>4</sub> T-OCHO ( <i>m/z</i> 401)                            | 0.0514     | $4.57 \times 10^{-12}$                                  |
| D <sub>3</sub> T <sub>2</sub> -OH-OCHO ( <i>m/z</i> 385)           | 0.518      | $5.26 \times 10^{-12}$                                  |
| D <sub>3</sub> T <sub>2</sub> -(OH) <sub>2</sub> ( <i>m/z</i> 357) | 0.343      | $5.73 \times 10^{-12}$                                  |
| D <sub>4</sub> T-OH ( <i>m/z</i> 355)                              | 1.11       | $7.53 \times 10^{-12}$                                  |

598

599

600

601

602

603

604

605

606

607

608

609

610

611

612

613

614

615

616

617

618

619

620

621

622

623

624 Table S8. Experimental molar yields of HCHO and HCOOH. As these species are formed in the OFR at an unknown point, there  
625 may be some loss through oxidation with OH. Consequently, the OH<sub>exp</sub> determined with D<sub>5</sub> may not represent the OH<sub>exp</sub> these VOP  
626 experienced.

| Experiment | $\Delta\text{HCHO}/\Delta\text{D}_5$ (ppb/ppb) | $\Delta\text{HCOOH}/\Delta\text{D}_5$ (ppb/ppb) |
|------------|------------------------------------------------|-------------------------------------------------|
| 1          | 1.79 ± 0.55                                    | 0.94 ± 0.15                                     |
| 2          | 1.35 ± 0.29                                    | 0.69 ± 0.09                                     |
| 3          | 1.21 ± 0.28                                    | 0.52 ± 0.09                                     |
| 4          | 1.52 ± 0.28                                    | 0.90 ± 0.09                                     |
| 5          | 1.28 ± 0.23                                    | 0.83 ± 0.09                                     |
| 6          | 0.96 ± 0.13                                    | 0.62 ± 0.05                                     |
| 7          | 1.06 ± 0.21                                    | 0.68 ± 0.05                                     |
| 8          | 1.18 ± 0.18                                    | 0.80 ± 0.07                                     |
| 9          | 0.88 ± 0.09                                    | 0.60 ± 0.04                                     |
| 10         | 0.69 ± 0.28                                    | 1.27 ± 0.11                                     |
| 11         | 0.55 ± 0.17                                    | 0.84 ± 0.06                                     |
| 12         | 0.52 ± 0.10                                    | 0.68 ± 0.04                                     |
| 13         | 2.11 ± 1.18                                    | 0.98 ± 0.37                                     |
| 14         | 1.11 ± 0.43                                    | 0.49 ± 0.12                                     |
| 15         | 1.15 ± 0.37                                    | 0.45 ± 0.12                                     |

627  
628  
629  
630  
631  
632  
633  
634  
635  
636  
637  
638  
639  
640



641 **Table S9. Summary of low-NO<sub>x</sub> SOSiA experiments in the literature. The  $Y_{\text{SOSiA}}$  and  $C_{\text{OA}}$  from the literature were multiplied by**  
642  **$1.07/(\rho_{\text{SOSiA}}$  used in the reference) to compare with the values from this study. Wu and Johnston (2017) did not provide a  $\rho_{\text{SOSiA}}$  nor**  
643 **an  $\text{OH}_{\text{exp}}$ , and so we assumed their  $\rho_{\text{SOSiA}}$  to be the same used here ( $\rho_{\text{SOSiA}} = 1.07 \text{ g cm}^{-3}$ ) and calculated  $\text{OH}_{\text{exp}}$  using their estimated**  
644  **$[\text{OH}]$  and residence time. Moreover, we converted the  $\Delta\text{D}_5$  they report from ppb to  $\mu\text{g m}^{-3}$  with  $370.8 \text{ g mol}^{-1}$ ,  $298 \text{ K}$ , and  $1 \text{ atm}$  to**  
645 **calculate their  $Y_{\text{SOSiA}}$ . Janecek et al. (2019) conducted experiments with and without ammonium sulfate (AS) seed and found that**  
646 **the SOSiA mass concentration would increase with the addition of seed aerosol. However, Janecek et al. (2019) do not explicitly state**  
647 **whether the  $Y_{\text{SOSiA}}$  in their Table 1 is from those seeded cases. Charan et al. (2022) does not provide a summary of  $C_{\text{OA}}$ , so we calculated**  
648 **them using the values in their Table 1 at  $1 \text{ atm}$ , and we included the  $Y_{\text{SOSiA}}$  from their oxidation flow tube with and without the**  
649 **particle wall loss corrections. Han et al. (2022) provided a range of  $\rho_{\text{SOSiA}}$  of  $1.6\text{-}1.8 \text{ g cm}^{-3}$  for a variety of cyclosiloxane precursors,**  
650 **and we used a value of  $1.7 \text{ g cm}^{-3}$  for the  $\rho_{\text{SOSiA}}$  adjustment.**

| Reference                 | Experiment Set Up                                                            | $Y_{\text{SOSiA}}$<br>(%) | $\text{OH}_{\text{exp}}$ ( $\text{s cm}^{-3}$ ) | $C_{\text{OA}}$ ( $\mu\text{g m}^{-3}$ ) | Seed | $\rho_{\text{SOSiA}}$ ( $\text{g cm}^{-3}$ ) |
|---------------------------|------------------------------------------------------------------------------|---------------------------|-------------------------------------------------|------------------------------------------|------|----------------------------------------------|
| Wu and Johnston<br>(2017) | PFA photo-oxidation<br>chamber (50 L, $\tau_{\text{res}} = 15$<br>min)       | 7.9                       | $9 \times 10^{10}$                              | 1.2                                      | None | N/A, assumed<br>to be the same<br>used here. |
|                           |                                                                              | 9.9                       | $9 \times 10^{10}$                              | 3.3                                      | None |                                              |
|                           |                                                                              | 12.7                      | $9 \times 10^{10}$                              | 5.6                                      | None |                                              |
|                           |                                                                              | 14.3                      | $9 \times 10^{10}$                              | 8.0                                      | None |                                              |
|                           |                                                                              | 15.8                      | $9 \times 10^{10}$                              | 12.0                                     | None |                                              |
|                           |                                                                              | 13.8                      | $9 \times 10^{10}$                              | 2.3                                      | AS   |                                              |
|                           |                                                                              | 15.1                      | $9 \times 10^{10}$                              | 3.2                                      | AS   |                                              |
|                           |                                                                              | 17.5                      | $9 \times 10^{10}$                              | 4.5                                      | AS   |                                              |
|                           |                                                                              | 21.8                      | $9 \times 10^{10}$                              | 9.6                                      | AS   |                                              |
|                           |                                                                              | 23.1                      | $9 \times 10^{10}$                              | 12.6                                     | AS   |                                              |
| Janecek et al.<br>(2019)  | PAM-OFR (13.3 L, $\tau_{\text{res}} =$<br>2.7 or 3.8 min)                    | 30                        | $4.8 \times 10^{12}$                            | 219.7                                    | N/A  | 0.959                                        |
|                           |                                                                              | 24                        | $2.3 \times 10^{12}$                            | 84.0                                     | N/A  |                                              |
|                           |                                                                              | 22                        | $1.6 \times 10^{12}$                            | 107.1                                    | N/A  |                                              |
|                           |                                                                              | 50                        | $5.1 \times 10^{12}$                            | 180.7                                    | N/A  |                                              |
|                           |                                                                              | 24                        | $2.7 \times 10^{12}$                            | 68.4                                     | N/A  |                                              |
| Charan et al.<br>(2022)   | FEP chamber ( $19 \text{ m}^3$ )                                             | 1.5                       | $9 \times 10^{10}$                              | 20.                                      | AS   | 1.52                                         |
|                           |                                                                              | 5.7                       | $8 \times 10^{10}$                              | 44.                                      | AS   |                                              |
|                           |                                                                              | 0                         | $6 \times 10^{10}$                              | 0                                        | AS   |                                              |
|                           |                                                                              | 2.6                       | $3 \times 10^{10}$                              | 19.                                      | AS   |                                              |
| Charan et al.<br>(2022)   | Caltech photo-oxidation<br>flow tube ( $\tau_{\text{res}} = 671 \text{ s}$ ) | 1.9/1.1                   | $1.4 \times 10^{10}$                            | 1.3                                      | None | 1.52                                         |
|                           |                                                                              | 2.9/1.8                   | $1.5 \times 10^{11}$                            | 19                                       | None |                                              |
|                           |                                                                              | 9.2/6.0                   | $3.3 \times 10^{11}$                            | 67                                       | None |                                              |
|                           |                                                                              | 6.7/4.6                   | $1.5 \times 10^{11}$                            | 70.                                      | None |                                              |
|                           |                                                                              | 19/14                     | $7.8 \times 10^{11}$                            | 336                                      | None |                                              |
|                           |                                                                              | 32/24                     | $1.0 \times 10^{12}$                            | 643                                      | None |                                              |

|                     |                                                                                        |         |                       |        |      |         |
|---------------------|----------------------------------------------------------------------------------------|---------|-----------------------|--------|------|---------|
|                     |                                                                                        | 49/35   | $1.1 \times 10^{12}$  | 993    | None |         |
|                     |                                                                                        | 157/109 | $3.2 \times 10^{12}$  | 3969   | None |         |
|                     |                                                                                        | 158/110 | $3.2 \times 10^{12}$  | 4046   | None |         |
|                     |                                                                                        | 138/102 | $3.1 \times 10^{12}$  | 1276   | None |         |
|                     |                                                                                        | 128/94  | $3.3 \times 10^{12}$  | 1176   | None |         |
| Han et al. (2022)   | Environment and Climate Change Canada OFR (16 L, $\tau_{\text{res}} = 2 \text{ min}$ ) | 2       | $5.5 \times 10^{10}$  | 0.5    | None | 1.6-1.8 |
|                     |                                                                                        | 2       | $1.4 \times 10^{11}$  | 1.8    | None |         |
|                     |                                                                                        | 11      | $3.5 \times 10^{11}$  | 16.9   | None |         |
|                     |                                                                                        | 27      | $5.0 \times 10^{11}$  | 48.9   | None |         |
|                     |                                                                                        | 35      | $6.0 \times 10^{11}$  | 68.7   | None |         |
|                     |                                                                                        | 46      | $6.9 \times 10^{11}$  | 97.7   | None |         |
|                     |                                                                                        | 61      | $9.0 \times 10^{11}$  | 169.7  | None |         |
|                     |                                                                                        | 70      | $1.2 \times 10^{12}$  | 228.8  | None |         |
|                     |                                                                                        | 75      | $1.3 \times 10^{12}$  | 253.6  | None |         |
|                     |                                                                                        | 79      | $1.7 \times 10^{12}$  | 282.7  | None |         |
|                     |                                                                                        | 80      | $1.9 \times 10^{12}$  | 273.6  | None |         |
|                     |                                                                                        | 2       | $5.5 \times 10^{12}$  | 0.8    | AS   |         |
| 1                   | $1.4 \times 10^{12}$                                                                   | 2.0     | AS                    |        |      |         |
| Avery et al. (2023) | PAM-OFR (13.3 L, $\tau_{\text{res}} = 130 \text{ s}$ )                                 | 2       | $1.15 \times 10^{12}$ | 3.84   | None | 1.78    |
|                     |                                                                                        | 16      | $2.42 \times 10^{12}$ | 28.47  | None | 1.67    |
|                     |                                                                                        | 37      | $3.77 \times 10^{12}$ | 66.89  | None | 1.64    |
|                     |                                                                                        | 42      | $4.55 \times 10^{12}$ | 76.12  | None | 1.61    |
|                     |                                                                                        | 82      | $5.23 \times 10^{12}$ | 149.44 | None | 1.60    |
|                     |                                                                                        | 104     | $6.21 \times 10^{12}$ | 189.02 | None | 1.60    |
|                     |                                                                                        | 146     | $8.23 \times 10^{12}$ | 267.47 | None | 1.59    |

651  
652  
653  
654  
655  
656  
657  
658

659 **Table S10. Odum 2-product model fit values. These 2-product parameterizations do not account for OH<sub>exp</sub>.** Janecek et al. (2019)  
 660 **and Charan et al. (2022) state the values below, and Charan et al. (2022) provided 2 fits: with/without particle wall-loss corrections.**  
 661 **Han et al. (2022) and Avery et al. (2023) did not provide 2-product parameterizations, so we fit their data that was adjusted to  $\rho_{\text{SOSiA}} = 1.07 \text{ g cm}^{-3}$ ;**  
 662 **the original  $\rho_{\text{SOSiA}}$  are in Table S9. We also performed a fit with all values, including those in the literature.**

| Reference                                                                    | $\alpha_1$  | $\alpha_2$ | $K_1$                  | $K_2$                                   |
|------------------------------------------------------------------------------|-------------|------------|------------------------|-----------------------------------------|
| Janecek et al. (2019)<br>( $\rho_{\text{SOSiA}} = 0.959 \text{ g cm}^{-3}$ ) | 0.14        | 0.82       | 1.05                   | 0.00207                                 |
| Charan et al. (2022)<br>( $\rho_{\text{SOSiA}} = 1.52 \text{ g cm}^{-3}$ )   | 0.056/0.044 | 7.7/5.5    | 0.022/0.027            | $4.3 \times 10^{-5}/6.0 \times 10^{-5}$ |
| Han et al. (2022)<br>( $\rho_{\text{SOSiA}} = 1.07 \text{ g cm}^{-3}$ )      | 0.4598      | 1.284      | $1.432 \times 10^{-2}$ | $8.546 \times 10^{-4}$                  |
| Avery et al. (2023)<br>( $\rho_{\text{SOSiA}} = 1.07 \text{ g cm}^{-3}$ )    | 5.301       | 9.756      | $3.161 \times 10^{-4}$ | $4.209 \times 10^{-4}$                  |
| This paper<br>( $\rho_{\text{SOSiA}} = 1.07 \text{ g cm}^{-3}$ )             | 0.2266      | 0.6864     | 0.01478                | $9.611 \times 10^{-4}$                  |
| All Values<br>( $\rho_{\text{SOSiA}} = 1.07 \text{ g cm}^{-3}$ )             | 0.3774      | 1.743      | 0.02482                | $2.486 \times 10^{-4}$                  |

663  
664  
665  
666  
667  
668  
669  
670  
671  
672  
673  
674  
675  
676  
677  
678  
679  
680

681 **Table S11. Fit VBS product mass yields ( $\alpha_i$ ) and chemical aging rate coefficients ( $k_{\text{age,gas}}$ ). The  $k_{\text{age,gas}}$  is for the aging-VBS model**  
 682 **where  $\text{OH}_{\text{exp}}$  is explicitly parameterized with the and “bin-hopping” as described in Section 3.2. We performed fits using the data**  
 683 **from our experiments and all values, which includes those in the literature. For  $\alpha_i$  smaller than  $10^{-5}$ , we marked them as 0.**

| $C^*$                               | <b>0.1</b>             | <b>1</b>               | <b>10</b>              | <b>100</b>             | <b>1000</b>            | <b>10000</b> | $k_{\text{age,gas}}$    |
|-------------------------------------|------------------------|------------------------|------------------------|------------------------|------------------------|--------------|-------------------------|
| This study<br>$\alpha_i$ (no aging) | $8.467 \times 10^{-4}$ | 0                      | 0.1193                 | 0                      | 0.7043                 | 0.1756       | N/A                     |
| This study<br>$\alpha_i$ (aging)    | $1.237 \times 10^{-4}$ | $2.320 \times 10^{-3}$ | $1.373 \times 10^{-2}$ | $8.674 \times 10^{-2}$ | $2.913 \times 10^{-5}$ | 0.8971       | $2.169 \times 10^{-11}$ |
| All values<br>$\alpha_i$ (no aging) | $7.412 \times 10^{-2}$ | 0                      | 0                      | 0                      | 0.6599                 | 0.2660       | N/A                     |
| All values<br>$\alpha_i$ (aging)    | $8.328 \times 10^{-5}$ | $1.562 \times 10^{-3}$ | $9.242 \times 10^{-3}$ | $5.839 \times 10^{-2}$ | $2.319 \times 10^{-5}$ | 0.9307       | $1.086 \times 10^{-11}$ |

684

685

686

687

688

689

690

691

692

693

694

695

696

697

698

699

700

701

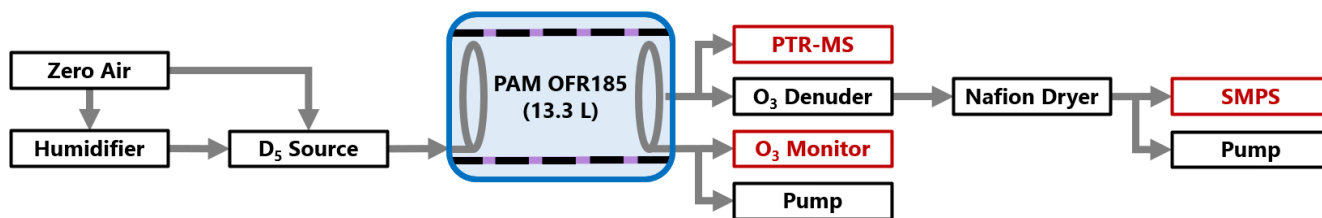

702

703 **Figure S1. PAM-OFR experiment set up.** The D<sub>5</sub> source was a syringe pump injecting into a passivated glass bulb. The side ports  
 704 were equipped with conductive Teflon flow rings on both ends of the PAM-OFR. We covered 90 % of the 185 nm UV lamps to  
 705 achieve lower irradiances and OH<sub>exp</sub>. We conducted experiments at  $\tau_{res} = 120$  s with 6.65 L min<sup>-1</sup> or 180 s with 4.43 L min<sup>-1</sup>  
 706 respectively.

707

708

709

710

711

712

713

714

715

716

717

718

719

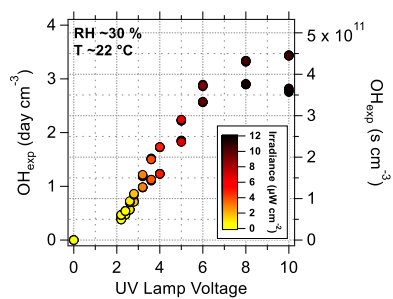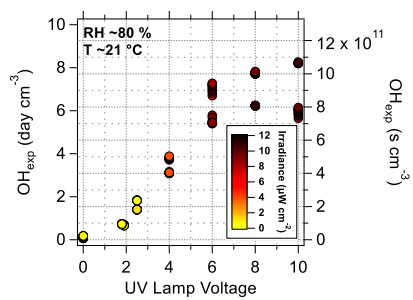

720

721

722 **Figure S2. Offline OH<sub>exp</sub> calibrations with CO at low and high humidity conditions. The OH<sub>exp</sub> measured during experiments with**  
 723 **D<sub>5</sub> were consistent with the offline calibration values.**

724

725

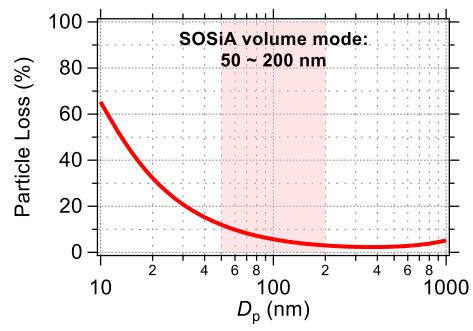

726

727 **Figure S3. Calculated particle losses with diameters (von der Weiden et al., 2009) using the dimensions of the aerosol sampling line.**  
728 **The shaded area refers to the aerosol volume modes found during experiments.**

729

730

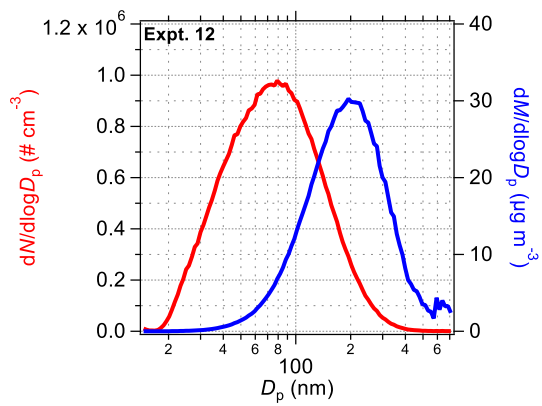

731  
732 **Figure S4. SOSiA particle size distribution for experiment 12, where  $[D_5]_0$  and  $\text{OH}_{\text{exp}}$  were high.**  
733  
734



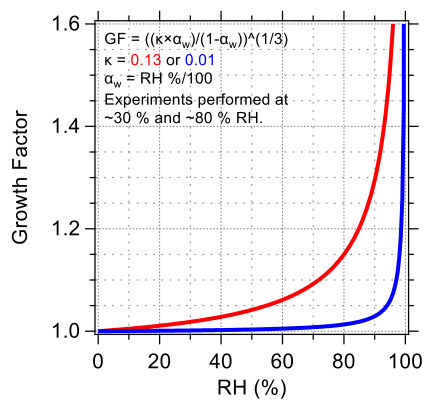

735

736 **Figure S5. Particle growth factor vs. RH (%) for  $\kappa = 0.13$  and  $0.01$ .** Palm et al. (2016) used the SOA hygroscopicity factor ( $\kappa = 0.13$ ),  
 737 **while Janecek et al. (2019) found SOSiA to be non-hygroscopic ( $\kappa = 0.01$ ).**

738

739

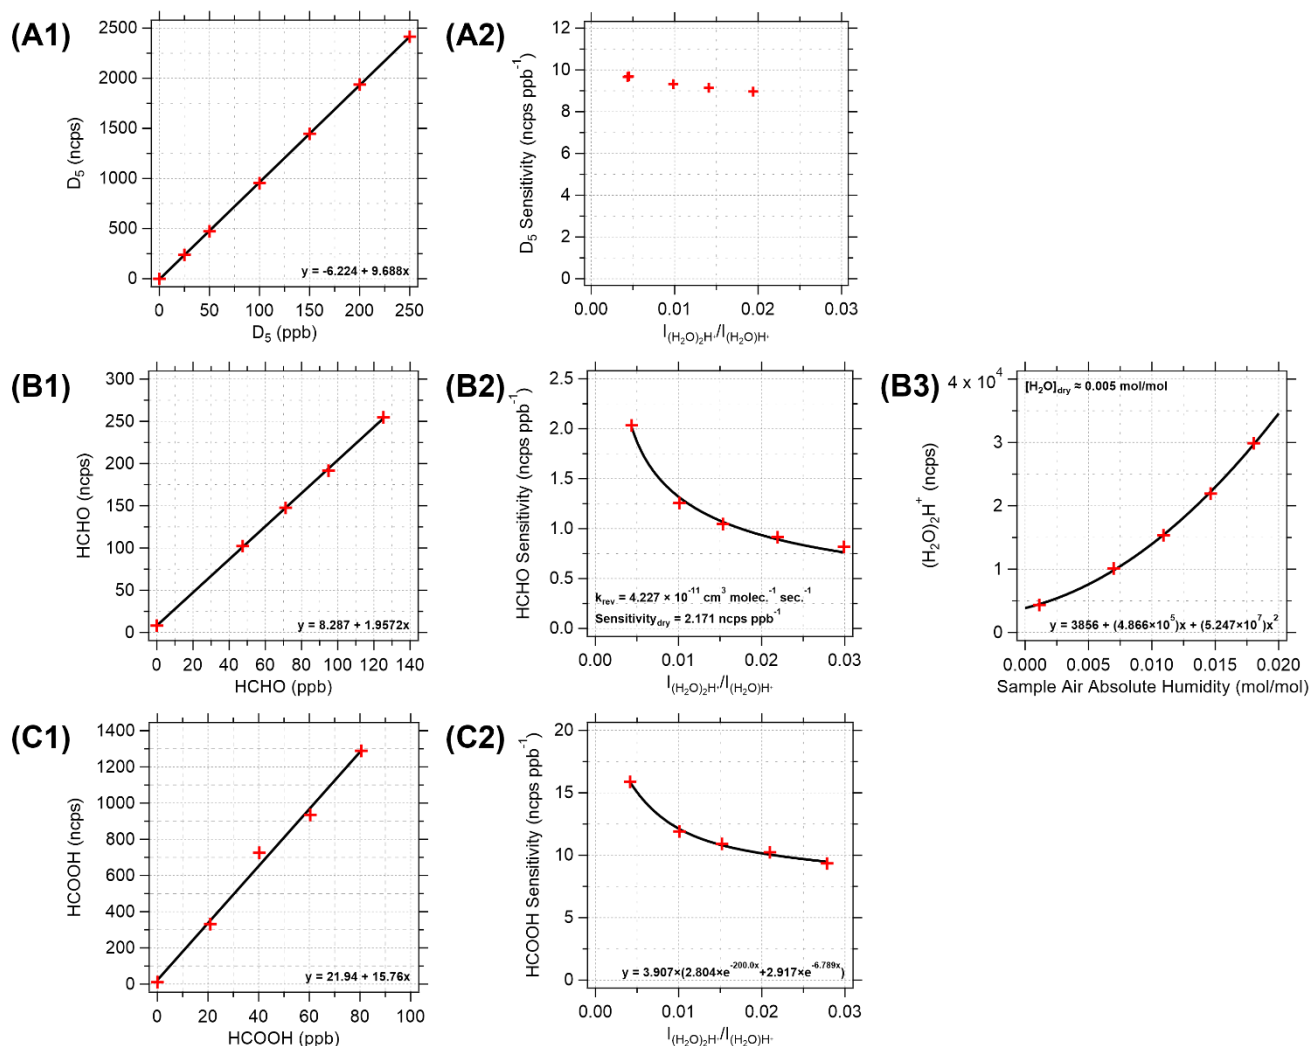

740

741 **Figure S6. (A1, B1, C1) Calibration curves of D<sub>5</sub>, HCHO, and HCOOH. The PTR-MS response was linear under these concentration**  
 742 **ranges. (A2, B2, C2) Sensitivity variation with humidity. We found the D<sub>5</sub> sensitivity at *m/z* 371 under 137 Td to be consistent with**  
 743 **changing humidity and did not apply a correction for the quantification. (B3) Polynomial fit to determine the H<sub>2</sub>O mixing ratio**  
 744 **contribution from the PTR-MS ion source.**

745

746

747

748

749

750

751

752

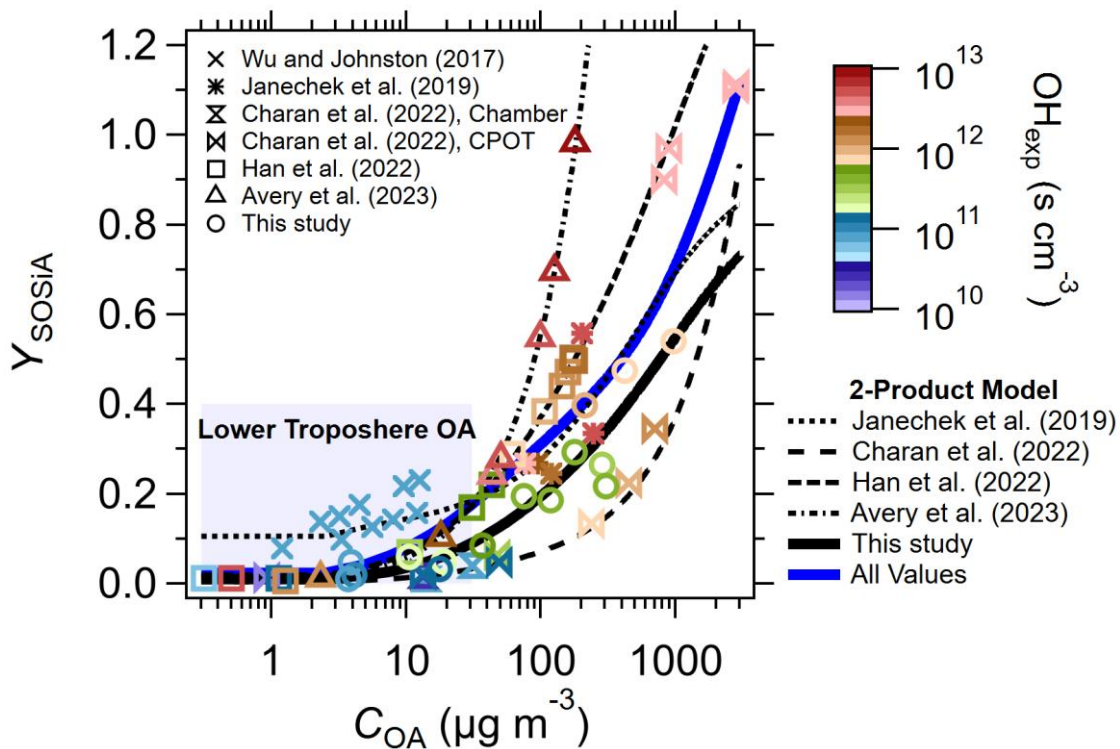

753

754 **Figure S7 Comparison of Odum 2-product model parameterizations between this study and the literature. The blue line is from the**  
 755 **fit with all data, including those we report.** The shaded area indicates the range of ambient OA concentrations commonly observed in the  
 756 lower troposphere (Porter et al., 2021). The figure shows the particle wall loss-corrected values from Charan et al. (2022). Han et al. (2022)  
 757 and Avery et al. (2023) did not provide 2-product parameterizations, so we fitted the values using their  $\rho_{\text{SOSiA}}$ -adjusted data (Table S10). Wu  
 758 and Johnston (2017) did not have measurements of  $\text{OH}_{\text{exp}}$  or  $D_5$  and instead provided estimates. The  $\text{OH}_{\text{exp}}$  (color scale) are those reported  
 759 by the literature.

760

761

762

763

764

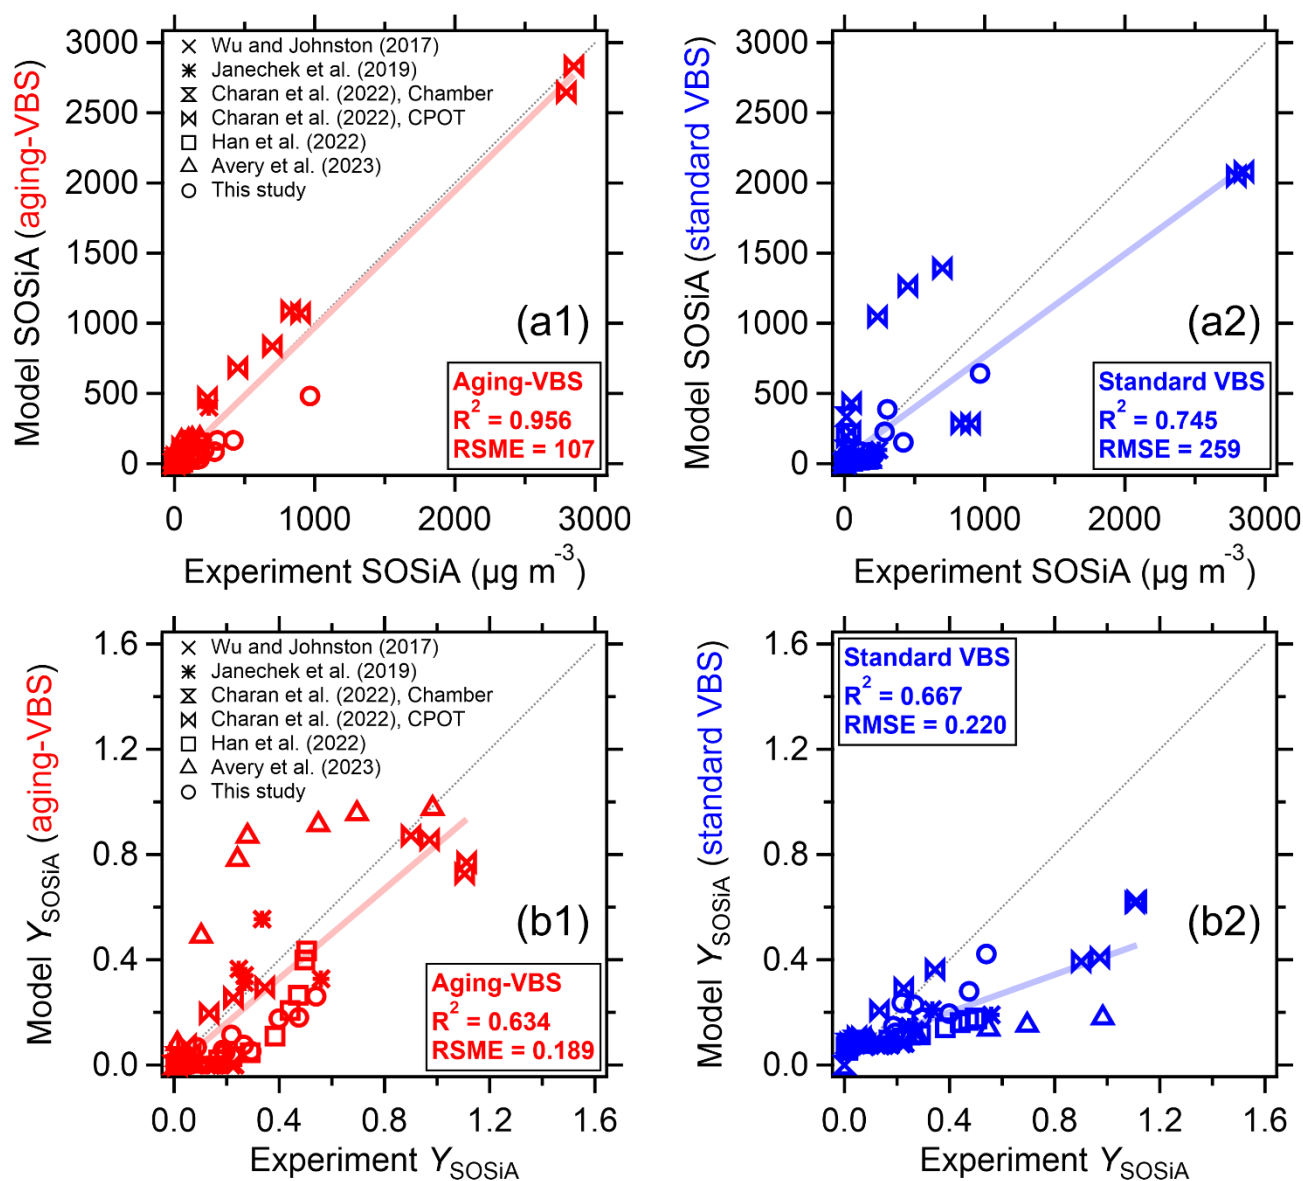

766

767 **Figure S8. Comparison of the (a) SOSiA mass and (b)  $Y_{\text{SOSiA}}$  from the (1) aging-VBS and (2) standard-VBS parameterizations fit**  
 768 **with values we report and those in the literature (Table S11). The  $R^2$  and root mean square error (RMSE) of the aging-VBS model**  
 769 **SOSiA is better than that of the standard VBS.**

770

771

772

773

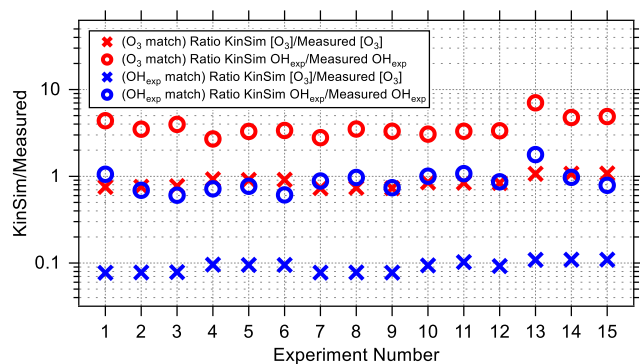

775

776 **Figure S9.** Ratio of the KinSim model outputs vs. measurements for each experiment. The “OH<sub>exp</sub> match” and “O<sub>3</sub> match” refers to  
 777 the cases where the UV flux is and is not adjusted so that the KinSim outputs of OH<sub>exp</sub> and O<sub>3</sub> are in line with measurements  
 778 respectively.

779

780

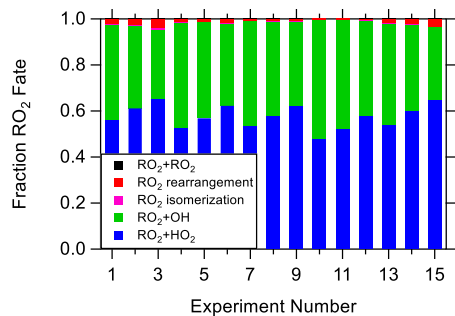

781

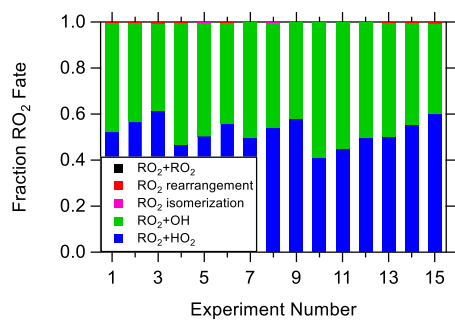

782

783 **Figure S10. KinSim estimations of RO<sub>2</sub> fates across experiments. The top panel has  $I_{254}$  and  $I_{185}$  multiplied by 0.1 ( $OH_{exp}$  matched),**  
 784 **while the bottom does not ( $O_3$  matched). In either case, KinSim calculated the RO<sub>2</sub> fates in all experiments to be dominated by the**  
 785 **RO<sub>2</sub> + HO<sub>2</sub> and RO<sub>2</sub> + OH pathways.**

786

787
